# Supplementary material
Source: PubMed Central journal article supplement (PMC6712485)
Supplement: mmc1.pdf [file mmc1.pdf]

**Biophysical Journal, Volume 117**

**Supplemental Information**

**Polyphosphate Initiates Tau Aggregation through Intra- and Intermolecular Scaffolding**

**Sanjula P. Wickramasinghe, Justine Lempart, Hope E. Merens, Jacob Murphy, Philipp Huettemann, Ursula Jakob, and Elizabeth Rhoades**

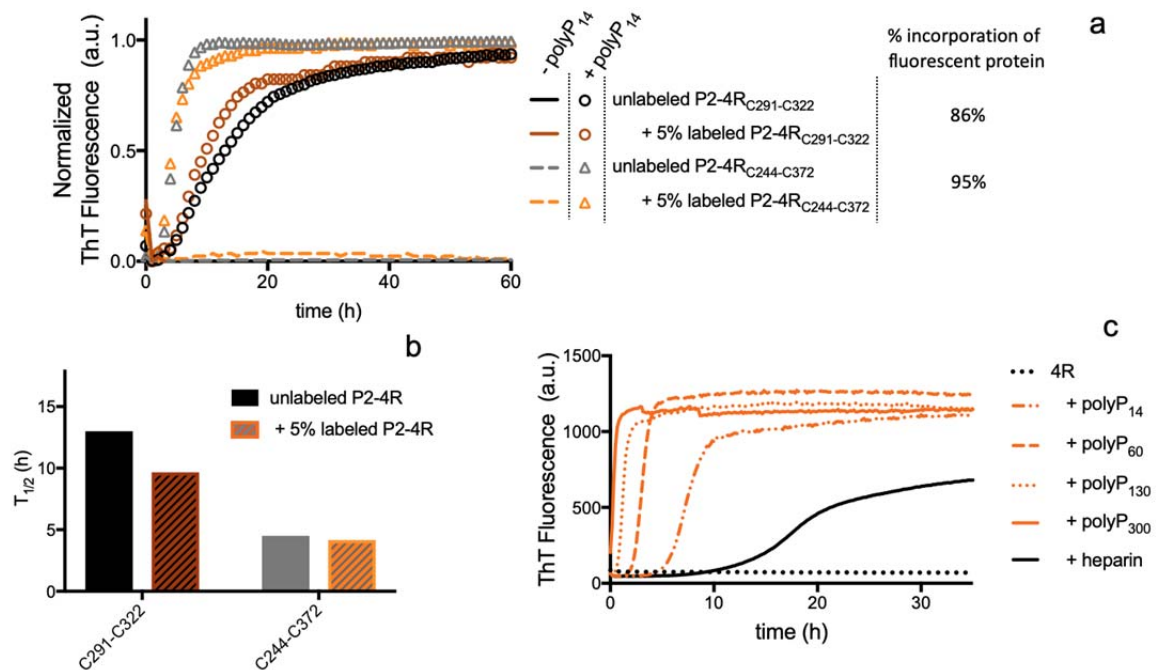

**Figure S1. Labeled tau is incorporated into aggregates.** Representative kinetic traces of ensemble aggregation measurements made using 100% unlabeled tau (black and gray) and 95 % unlabeled ta/5% fluorescently labeled tau (dark and light orange) in the absence or presence of 1 mM polyP<sub>14</sub> are shown (a). The incorporation of fluorescent into the aggregates is confirmed as described in the *Materials and Methods*. Kinetics were quantified by  $T_{1/2}$  (b). These experiments were carried out twice to ensure reproducibility. Representative kinetic traces of 4R aggregation as measured by an increase in Thioflavin T fluorescence for 25  $\mu$ M tau with 1 mM polyP or 18  $\mu$ M heparin (c).

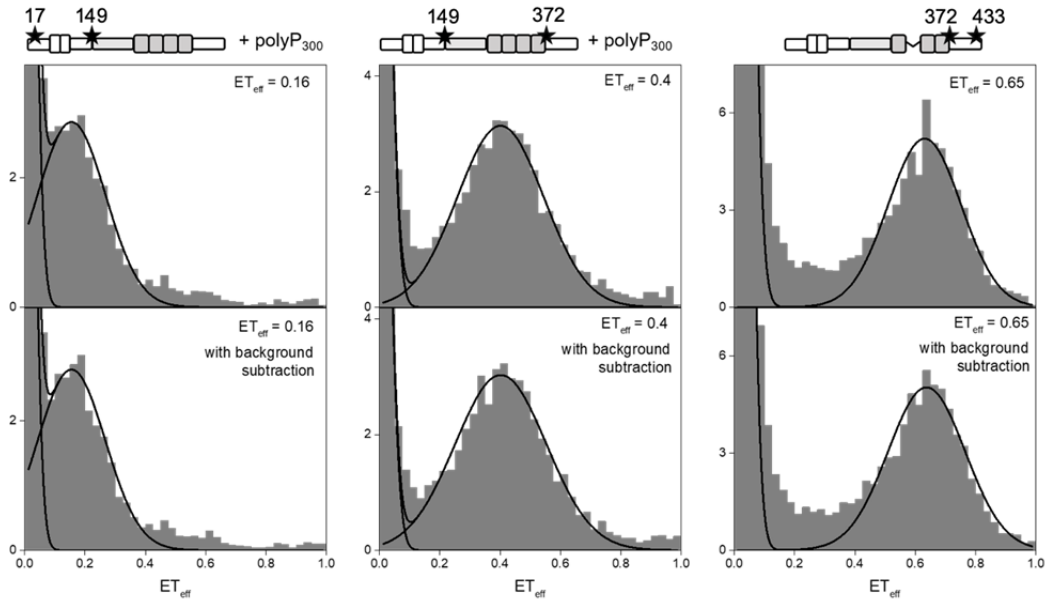

**Figure S2.  $ET_{\text{eff}}$  histograms without and with background subtraction.**  $ET_{\text{eff}}$  histograms for three different tau constructs without (upper) and with (lower) subtracting the average background signal from the individual events prior to calculating  $ET_{\text{eff}}$  as described in the *Materials & Methods*.

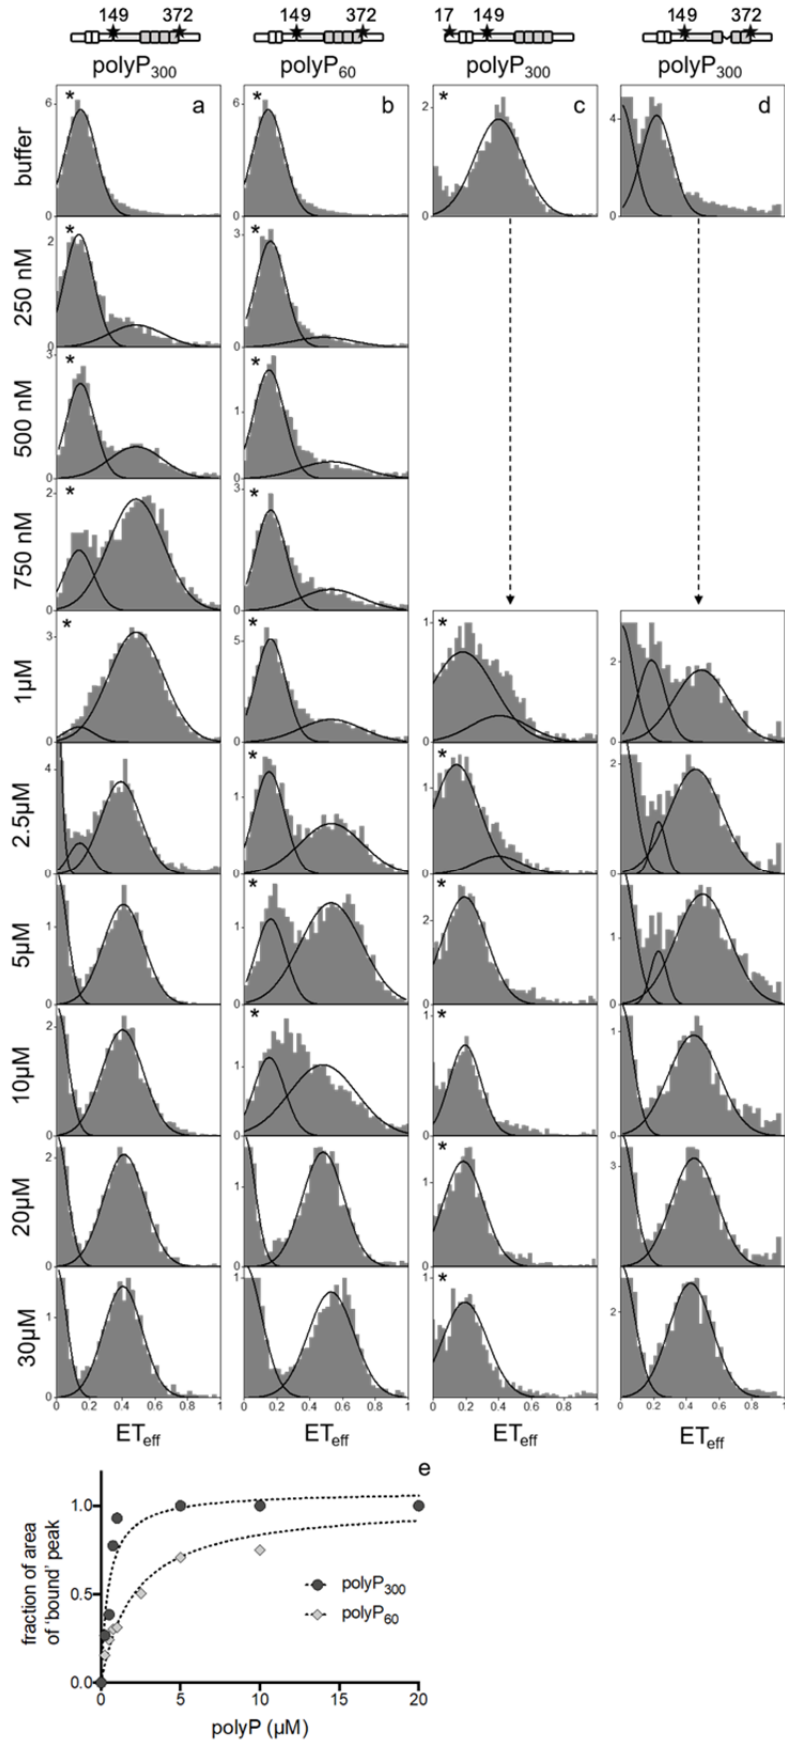

**Figure S3.  $ET_{\text{eff}}$  histograms as a function of polyP concentration. SmFRET**

measurements were made for 2N4R tau<sub>C149-C372</sub> with polyP<sub>300</sub> (a) or polyP<sub>60</sub> (b), tau<sub>C17-C149</sub> with polyP<sub>300</sub> (c) and 2N3R tau<sub>C149-C372</sub> with polyP<sub>300</sub> (d). PolyP concentrations ranged from 0 (top row) to 30  $\mu\text{M}$  (bottom row). All histograms converged to single peaks before or at 20  $\mu\text{M}$  polyP and no significant shifts in  $ET_{\text{eff}}$  were observed at higher concentrations of polyP. For calculation of binding curves, the center for the bound and unbound peaks were determined at limiting concentrations and fixed for intermediate concentrations when possible. Note that at high polyP concentrations (i.e. 20  $\mu\text{M}$ ) the polyP-bound peak is shifted from the polyP-bound peak at lower polyP concentrations (i.e. 20  $\mu\text{M}$ ). This likely reflects low affinity interactions between tau and polyP, as seen previously with heparin. The fraction of tau with polyP-bound (e) is calculated as the area of the bound peak over the total area of the bound and unbound peaks. These curves are fit with a hyperbolic binding equation to yield approximate  $K_D$ 's for polyP<sub>300</sub> (~0.4  $\mu\text{M}$  monomer or 1.3 nM chain) and polyP<sub>60</sub> (~2  $\mu\text{M}$  or 33 nM chain). An asterisk in the left hand corner of a panel indicates the measurement was made using PIE-FRET.

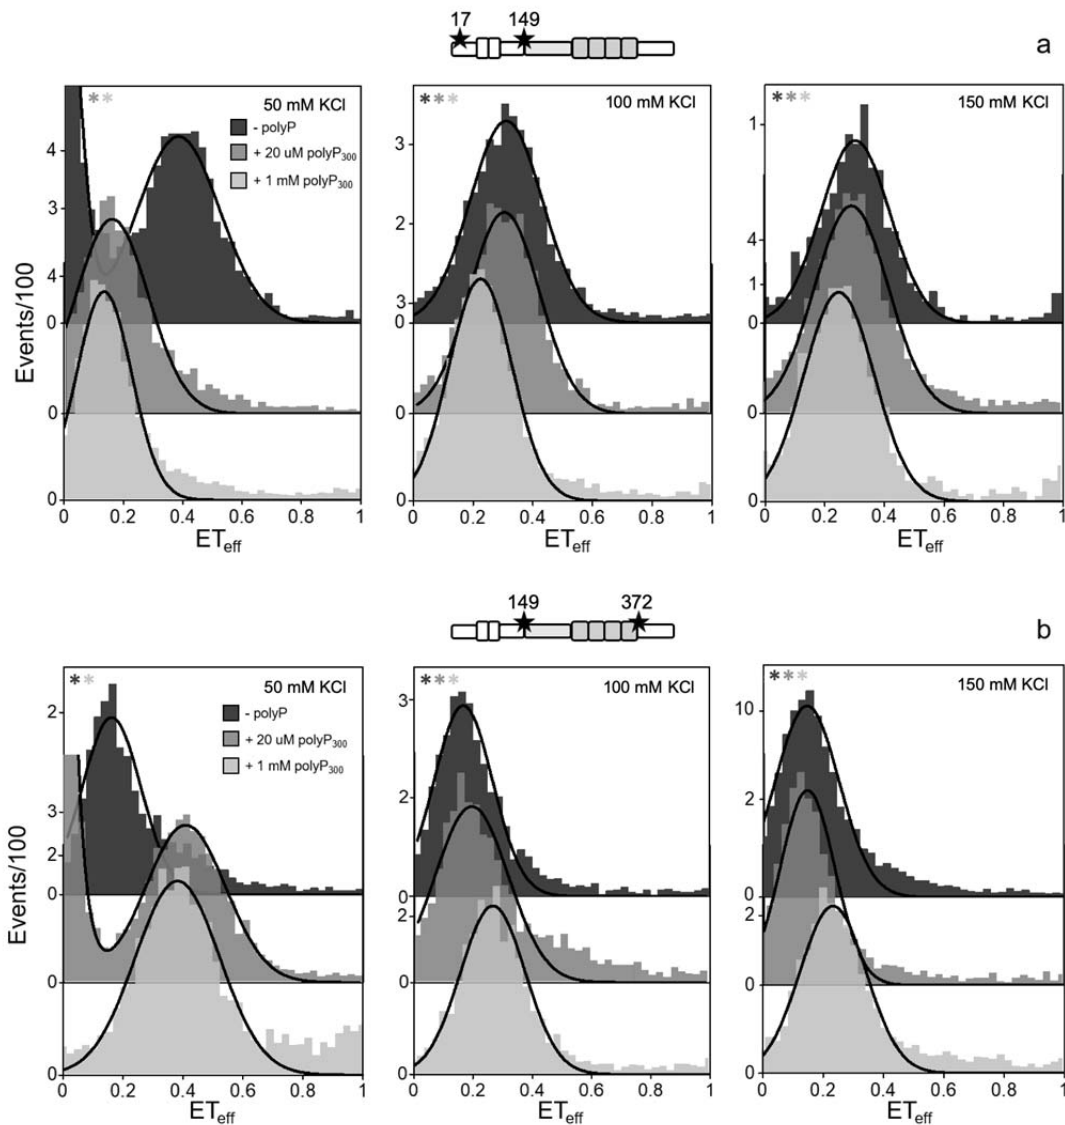

**Figure S4.  $ET_{eff}$  histograms in the presence of polyP and increased KCl** SmFRET measurements were made for 2N4R  $\tau_{C17-C149}$  (a) and  $\tau_{C149-C372}$  (b) with 50mM (left column), 100 mM (middle column) and 150 mM (right column) KCl in the absence of polyP (top row) and with the addition of 20  $\mu$ M (middle row) and 1 M polyP<sub>300</sub> (bottom row). While 20  $\mu$ M polyP causes only small changes in the histograms at higher salt concentrations, the polyP-bound peak is populated 1 M polyP<sub>300</sub> for both 100 mM and 150 mM KCl. An asterisk in the left hand corner of a panel indicates the measurement was made using PIE-FRET.

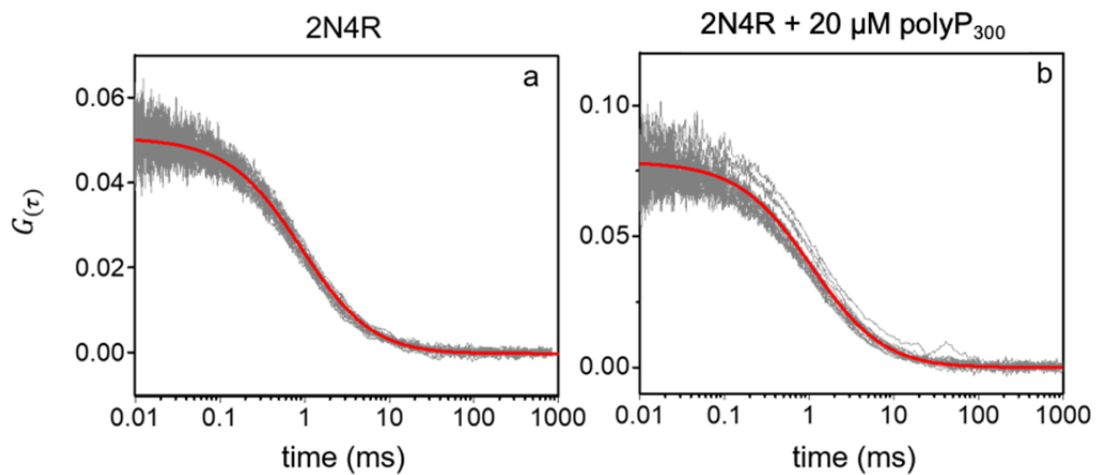

**Figure S5. Representative autocorrelation curves measured by FCS.** Shown are 25 individual autocorrelation curves of 10 seconds each (gray) along with the fit to the averaged curve (red) for 20 nM 2N4R tau in the absence (a) or presence (b) of 20  $\mu$ M polyP<sub>300</sub>.

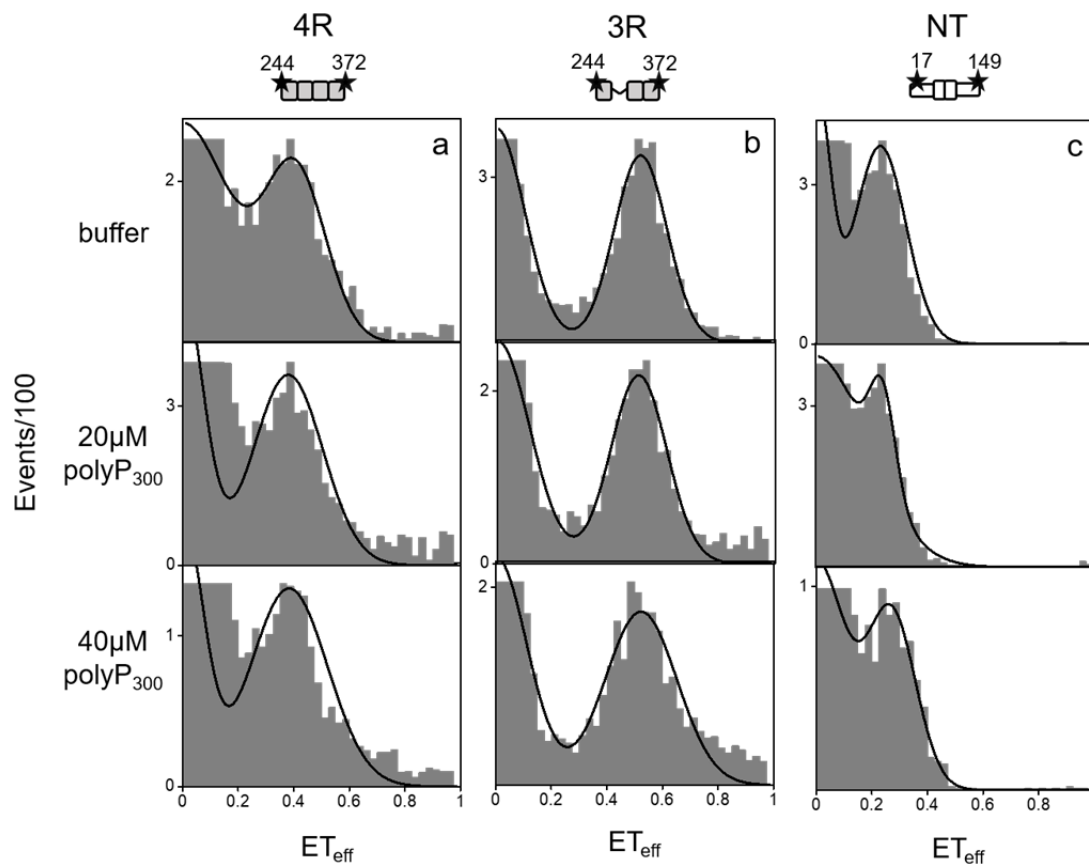

**Figure S6. PolyP does not cause conformational changes in the MTBR and N-terminal fragments.** Histograms measured by smFRET of 4R<sub>C244-C372</sub> (a), 3R<sub>C244-C372</sub> (b) and NT<sub>C17-C149</sub> (c) in the absence (upper row) and presence of 20  $\mu$ M (center row) or 40  $\mu$ M (lower row) polyP<sub>300</sub>. The higher polyP concentration was tested to determine whether weak binding occurs in either of these regions. No changes to the histograms are observed for these fragments even at the higher polyP concentration.



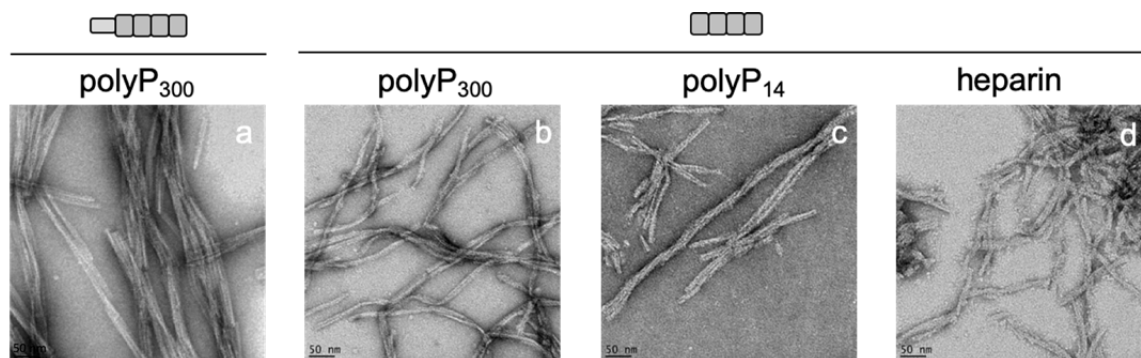

**Figure S7. TEM images of tau-polyP fibers.** Images of P2-4R with polyP<sub>300</sub> (a) and 4R with polyP<sub>300</sub> (b), polyP<sub>14</sub> (c) and heparin (d).

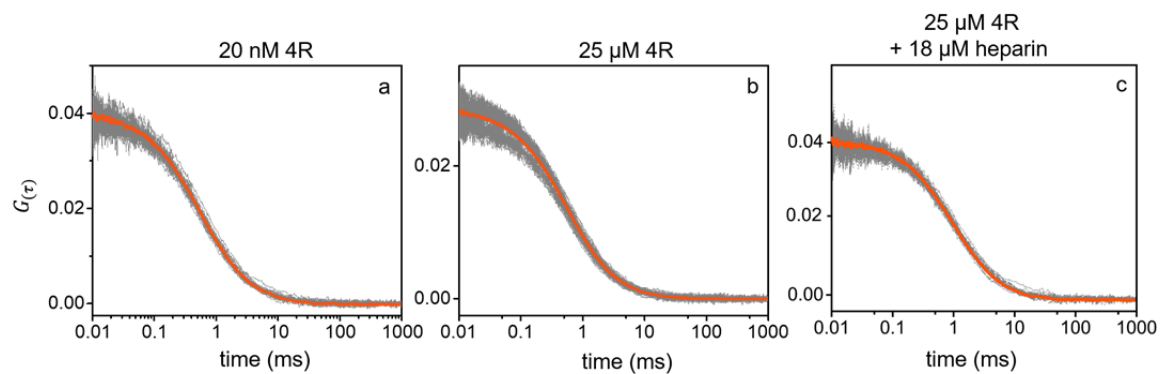

**Figure S8. PolyP is required for crosslinking of tau.** Autocorrelation curves of 20 nM labeled 4R in the absence (a) or presence (b) of 25  $\mu$ M unlabeled 4R or (c) 25  $\mu$ M unlabeled 4R and 18  $\mu$ M heparin. Fits of the averaged curves yield comparable diffusion times, despite the 1000x difference in tau concentration.

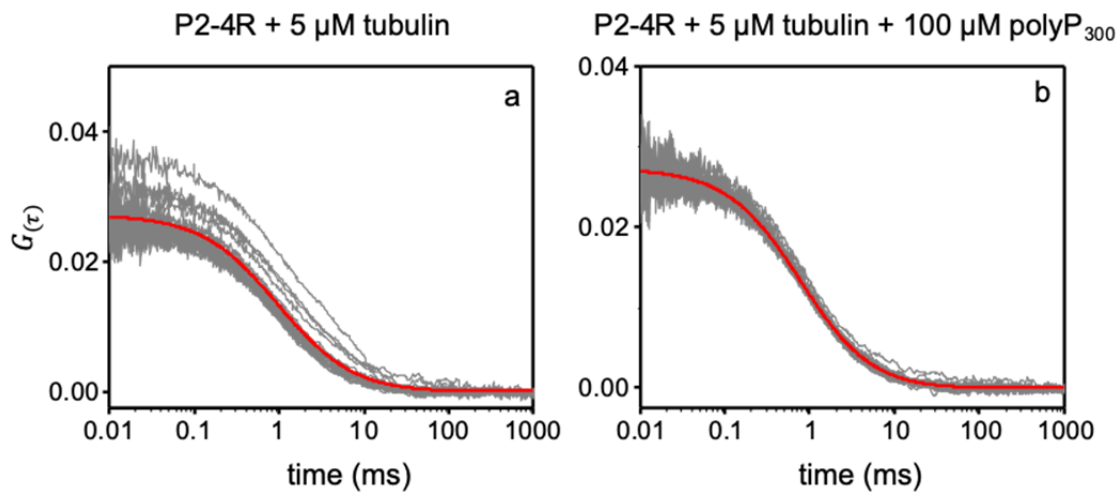

**Figure S9. Autocorrelation curves of P2-4R with tubulin and polyP<sub>300</sub>.**

Autocorrelation curves of P2-4R and 5  $\mu$ M tubulin in the absence (a) or presence (b) of 100  $\mu$ M polyP<sub>300</sub>.

| labeling positions | construct | ET <sub>eff</sub><br>(buffer) | ET <sub>eff</sub><br>(+ polyP <sub>300</sub> ) | ΔET <sub>eff</sub> |
|--------------------|-----------|-------------------------------|------------------------------------------------|--------------------|
| C17-C433           | 2N4R      | 0.15 ± 0.004                  | 0.09 ± 0.004                                   | -0.06 ± 0.006      |
|                    | 2N3R      | 0.18 ± 0.002                  | 0.11 ± 0.006                                   | -0.07 ± 0.006      |
| C17-C149           | 2N4R      | 0.40 ± 0.01                   | 0.18 ± 0.003                                   | -0.22 ± 0.010      |
|                    | 2N3R      | 0.40 ± 0.004                  | 0.21 ± 0.005                                   | -0.19 ± 0.006      |
| C149-C372          | 2N4R      | 0.17 ± 0.005                  | 0.40 ± 0.002                                   | 0.23 ± 0.005       |
|                    | 2N3R      | 0.19 ± 0.002                  | 0.44 ± 0.009                                   | 0.25 ± 0.009       |
| C372-C433          | 2N4R      | 0.69 ± 0.003                  | 0.50 ± 0.006                                   | -0.19 ± 0.007      |
|                    | 2N3R      | 0.66 ± 0.002                  | 0.46 ± 0.006                                   | -0.20 ± 0.006      |

**Table S1. Mean ET<sub>eff</sub> values for 2N3R and 2N4R tau in the absence and presence of 20 μM polyP<sub>300</sub>.** Mean ET<sub>eff</sub> and s.e.m. calculated for a minimum of three measurements with and without the addition of polyP. ΔET<sub>eff</sub> is the difference between tau+polyP<sub>300</sub> and tau. Error of ΔET<sub>eff</sub> is calculated by propagation of error as described in the *Materials and Methods*. Representative histograms are shown in Fig. 2.

|       | diffusion time ( $\mu$ s) |                      |                     |
|-------|---------------------------|----------------------|---------------------|
|       | buffer                    | polyP <sub>300</sub> | polyP <sub>14</sub> |
| 2N4R  | 925 $\pm$ 1               | 1055 $\pm$ 5.6       | 940 $\pm$ 3.3       |
| P2-4R | 628 $\pm$ 8.5             | 763 $\pm$ 3.3        | 672 $\pm$ 5         |
| 4R    | 534 $\pm$ 1.0             | 617 $\pm$ 1.0        | 566 $\pm$ 1.2       |
| 2N3R  | 909 $\pm$ 12.0            | 1056 $\pm$ 10.2      | 941 $\pm$ 1.3       |
| P2-3R | 430 $\pm$ 10.0            | 504 $\pm$ 12.7       | 450 $\pm$ 7.0       |
| 3R    | 377 $\pm$ 2.5             | 417 $\pm$ 1.4        | 390 $\pm$ 5.3       |
| P1P2  | 482 $\pm$ 4.3             | 581 $\pm$ 2.2        | 502 $\pm$ 11.3      |
| NT    | 585 $\pm$ 0.7             | 592 $\pm$ 8          | 585 $\pm$ 3.0       |
| aSyn* | 550                       | 550                  |                     |

**Table S2. Mean diffusion times of tau constructs in the absence and presence of polyP<sub>300</sub> or polyP<sub>14</sub>.** Mean diffusion time and s.e.m. calculated from three independent sets of measurements. The percent change in diffusion time with the addition of polyP is shown in Fig. 3. aSyn was only measured once as a control.

| labeling positions | construct | ET <sub>eff</sub><br>(buffer) | ET <sub>eff</sub><br>(+ polyP <sub>300</sub> ) | Δ ET <sub>eff</sub> |
|--------------------|-----------|-------------------------------|------------------------------------------------|---------------------|
| C244-C372          | 2N4R      | 0.29 ± 0.008                  | 0.51 ± 0.002                                   | 0.22 ± 0.008        |
|                    | P2-4R     | 0.31 ± 0.002                  | 0.43 ± 0.003                                   | 0.12 ± 0.004        |
|                    | 4R        | 0.39 ± 0.004                  | 0.39 ± 0.016                                   | 0 ± 0.016           |
| C244-C372          | 2N3R      | 0.40 ± 0.002                  | 0.59 ± 0.001                                   | 0.19 ± 0.002        |
|                    | P2-3R     | 0.44 ± 0.006                  | 0.50 ± 0.006                                   | 0.07 ± 0.008        |
|                    | 3R        | 0.51 ± 0.006                  | 0.50 ± 0.006                                   | -0.01 ± 0.008       |
| C149-C244          | 2N4R      | 0.35 ± 0.005                  | 0.50 ± 0.002                                   | 0.15 ± 0.005        |
|                    | 2N3R      | 0.36 ± 0.005                  | 0.54 ± 0.005                                   | 0.18 ± 0.007        |
|                    | PRR       | 0.39 ± 0.006                  | 0.47 ± 0.007                                   | 0.07 ± 0.009        |
| C17-C149           | 2N4R      | 0.40 ± 0.01                   | 0.18 ± 0.003                                   | -0.22 ± 0.010       |
|                    | 2N3R      | 0.40 ± 0.004                  | 0.21 ± 0.005                                   | -0.19 ± 0.006       |
|                    | NT        | 0.23 ± 0.014                  | 0.23 ± 0.015                                   | 0 ± 0.021           |

**Table S3. Mean ET<sub>eff</sub> for tau constructs in the absence and presence of polyP<sub>300</sub>.**

Mean ET<sub>eff</sub> and s.e.m calculated for a minimum of three measurements with and without the addition of polyP. ΔET<sub>eff</sub> is the difference between tau+polyP<sub>300</sub> and tau. Error of ΔET<sub>eff</sub> is calculated by propagation of error as described in the *Materials and Methods*. Representative histograms for the different conditions are show in Fig. 4 and Fig. S6.

| labeling positions | ET <sub>eff</sub> (buffer) | polyP                | ET <sub>eff</sub> (+polyP) | Δ ET <sub>eff</sub> |
|--------------------|----------------------------|----------------------|----------------------------|---------------------|
| C17-C149           | 0.40 ± 0.01                | polyP <sub>300</sub> | 0.18 ± 0.003               | -0.22 ± 0.010       |
|                    |                            | polyP <sub>130</sub> | 0.20 ± 0.004               | -0.20 ± 0.011       |
|                    |                            | polyP <sub>60</sub>  | 0.23 ± 0.009               | -0.17 ± 0.013       |
|                    |                            | polyP <sub>14</sub>  | 0.40 ± 0.013               | 0 ± 0.016           |
| C149-C372          | 0.17 ± 0.005               | polyP <sub>300</sub> | 0.40 ± 0.001               | 0.23 ± 0.005        |
|                    |                            | polyP <sub>130</sub> | 0.40 ± 0.004               | 0.23 ± 0.006        |
|                    |                            | polyP <sub>60</sub>  | 0.48 ± 0.01                | 0.35 ± 0.011        |
|                    |                            | polyP <sub>14</sub>  | 0.18 ± 0.029               | 0.01 ± 0.029        |

**Table S4. Mean ET<sub>eff</sub> of 2N4R tau in the absence and presence of different chain lengths of polyP.** Mean ET<sub>eff</sub> and s.e.m. calculated for a minimum of three measurements with and without the addition of polyP. ΔET<sub>eff</sub> is the difference between tau+polyP and tau. Error of ΔET<sub>eff</sub> is calculated by propagation of error as described in the *Materials and Methods*. Representative histograms of the different polyP chain lengths are shown in in Fig 5.

| construct | $T_{1/2}$ (h)        |                      |                     |                     |             |
|-----------|----------------------|----------------------|---------------------|---------------------|-------------|
|           | polyP <sub>300</sub> | polyP <sub>130</sub> | polyP <sub>60</sub> | polyP <sub>14</sub> | heparin     |
| 4R        | 0.4 ± 0.04           | 1.2 ± 0.07           | 3.4 ± 0.11          | 6.6 ± 0.51          | 15.5 ± 1.74 |
| 3R        | 4.3 ± 1.26           | 6.8 ± 1.07           | 30.3 ± 3.95         | 44.1 ± 3.2          | 67.2 ± 4.63 |

| construct            | $T_{1/2}$ (h) |             |             |             |
|----------------------|---------------|-------------|-------------|-------------|
|                      | P2-4R         | P2-3R       | 4R          | 3R          |
| polyP <sub>300</sub> | 0.3 ± 0.12    | 1.0 ± 0.32* | 0.4 ± 0.03* | 4.3 ± 0.80* |
| polyP <sub>14</sub>  | 8.0 ± 0.65    | 25.1 ± 2.33 | 7.2 ± 0.35  | 42.3 ± 2.32 |

**Table S5. Aggregation half-times ( $T_{1/2}$ ).** Mean  $T_{1/2}$  and s.e.m. from ensemble experiments using ThT fluorescence to follow aggregation kinetics. For the polyP<sub>300</sub> data, differences in the  $T_{1/2}$  of 3R as compared to 4R, P2-3R and P2-4R are statistically significant (denoted by \*) with p-values of 0.0007, 0.004 and 0.003 respectively. Table contains  $T_{1/2}$  times shown in Fig 6.



| labeling positions | ET <sub>eff</sub> (buffer) | heparin (μM) | ET <sub>eff</sub> (+ heparin) | ΔET <sub>eff</sub> |
|--------------------|----------------------------|--------------|-------------------------------|--------------------|
| C17-C149           | 0.40 ± 0.01                | 0.13         | 0.24 ± 0.003                  | -0.16 ± 0.010      |
|                    |                            | 1.75         | 0.24 ± 0.003                  | -0.16 ± 0.010      |
| C149-C372          | 0.17 ± 0.005               | 0.13         | 0.36 ± 0.001                  | 0.19 ± 0.005       |
|                    |                            | 1.75         | 0.35 ± 0.006                  | 0.18 ± 0.008       |

**Table S6. Mean ET<sub>eff</sub> of 2N4R tau in the absence and presence of heparin.** Mean ET<sub>eff</sub> and s.e.m. calculated for a minimum of three measurements without and with the addition of heparin. ΔET<sub>eff</sub> is the difference between tau+heparin and tau. Error of ΔET<sub>eff</sub> is calculated by propagation of error as described in the *Materials and Methods*.

Representative histograms are shown in Fig 7.

### Supporting References

1. Elbaum-Garfinkle, S., and E. Rhoades. 2012. Identification of an aggregation-prone structure of tau. *J Am Chem Soc.* 134:16607-16613.
