# Supplementary material
Source: PubMed Central journal article supplement (PMC6712485)
Supplement: mmc2.pdf [file mmc2.pdf]

# Polyphosphate Initiates Tau Aggregation through Intra- and Intermolecular Scaffolding

Sanjula P. Wickramasinghe,<sup>1</sup> Justine Lempart,<sup>2</sup> Hope E. Merens,<sup>3</sup> Jacob Murphy,<sup>2</sup> Philipp Huettemann,<sup>2</sup> Ursula Jakob,<sup>2,4</sup> and Elizabeth Rhoades<sup>1,3,\*</sup>

<sup>1</sup>Biochemistry and Molecular Biophysics Graduate Group, Perelman School of Medicine, University of Pennsylvania, Philadelphia, Pennsylvania; <sup>2</sup>Department of Molecular, Cellular, and Developmental Biology, University of Michigan, Ann Arbor, Michigan; <sup>3</sup>Department of Chemistry, University of Pennsylvania, Philadelphia, Pennsylvania; and <sup>4</sup>Department of Biological Chemistry, University of Michigan, Ann Arbor, Michigan

**ABSTRACT** The aggregation and deposition of tau is a hallmark of a class of neurodegenerative diseases called tauopathies. Despite intensive study, cellular and molecular factors that trigger tau aggregation are not well understood. Here, we provide evidence for two mechanisms relevant to the initiation of tau aggregation in the presence of cytoplasmic polyphosphates (polyP): changes in the conformational ensemble of monomer tau and noncovalent cross-linking of multiple tau monomers. We identified conformational changes throughout full-length tau, most notably diminishment of long-range interactions between the termini coupled with compaction of the microtubule binding and proline-rich regions. We found that while the proline-rich and microtubule binding regions both contain polyP binding sites, the proline-rich region is a requisite for compaction of the microtubule binding region upon binding. Additionally, both the magnitude of the conformational change and the aggregation of tau are dependent on the chain length of the polyP polymer. Longer polyP chains are more effective at intermolecular, noncovalent cross-linking of tau. These observations provide an understanding of the initial steps of tau aggregation through interaction with a physiologically relevant aggregation inducer.

**SIGNIFICANCE** The aggregation and deposition of the intrinsically disordered protein tau is linked to a number of devastating neurodegenerative disorders, including Alzheimer's disease. The structural changes and molecular mechanisms by which tau leads to neurodegeneration are of intense interest but are poorly understood. Here, we use single-molecule fluorescence and a cytoplasmic polyanionic molecule, polyphosphate, to study the key conformational and mechanistic steps that occur in the first stages of tau aggregation. We propose that polyphosphate accelerates tau aggregation by screening repulsive electrostatic interactions and serving as an intramolecular scaffold to enhance aggregation-favoring conformations, as well as an intermolecular scaffold for increasing local tau concentrations.

## INTRODUCTION

Neurodegenerative tauopathies are a class of heterogeneous dementias and movement disorders characterized by abnormal accumulation of the microtubule-associated protein tau in insoluble fibrillar aggregates (1). Aggregation transforms soluble, unstructured tau monomers into highly insoluble,  $\beta$ -sheet-rich paired helical filaments and neurofibrillary tangles. Although the increase of these insoluble aggregates

and the progression of symptoms of neurodegeneration are linked, the triggers and mechanisms by which aggregation occurs in the brain are not well characterized.

Normally, tau binds to and stabilizes microtubules and plays an important role in the organization of the cytoskeleton of neuronal cells (2). Monomer tau is intrinsically disordered and remains largely disordered even upon binding to microtubules (3,4). In vitro, tau is highly soluble and aggregates slowly; polyanionic molecules, such as the extracellular matrix glycosaminoglycan heparin, arachidonic acid, or lipid vesicles are commonly used to enhance the rate of aggregation (5–7). We recently demonstrated a similar activity for linear chains of anionic phosphates (i.e., polyphosphate [polyP]), which dramatically enhanced

Submitted March 25, 2019, and accepted for publication July 8, 2019.

\*Correspondence: [elizabeth.rhoades@sas.upenn.edu](mailto:elizabeth.rhoades@sas.upenn.edu)

Justine Lempart and Hope E. Merens contributed equally to this work.

Editor: David Eliezer.

<https://doi.org/10.1016/j.bpj.2019.07.028>

© 2019 Biophysical Society.

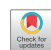

the aggregation rates of several amyloidogenic proteins, including tau (8). PolyP are present at micromolar concentrations in the cytosol of mammalian neurons (9,10) where they have the potential to interact with tau under normal physiological conditions.

Tau aggregation is generally described as nucleation dependent, with the nucleating species thought to be an “aggregation-prone” monomer (11). Recent evidence in support of this model comes from a study that identified monomer tau derived from heparin-induced aggregates as capable of seeding tau aggregation both in vitro and in cultured cells (12). A molecular description of the conformational change in monomer tau that predisposes it toward aggregation is of critical importance to developing a complete picture of the molecular determinants of aggregation. However, structural characterization of monomer tau is challenging because of its dynamic, disordered nature. NMR, which is capable of generating amino-acid-specific structural information (13), requires high protein concentrations that favor rapid aggregation in the presence of molecular inducers. Work from our lab has established that single-molecule Förster resonance energy transfer (smFRET) is a powerful approach to characterize conformations of aggregation-prone proteins (14,15).

In this study, we used smFRET and fluorescence correlation spectroscopy (FCS) to investigate polyP binding to tau. We identified that both the microtubule binding region (MTBR) and the proline-rich region (PRR) (Fig. 1) contain binding sites for polyP. Moreover, we found that longer polyP polymers were more effective at accelerating tau aggregation than shorter ones. Based on our results, we propose that polyP can serve both as an intramolecular scaffold, by binding to multiple sites within a single tau molecule, as well as an intermolecular scaffold by binding to multiple tau molecules simultaneously.

## MATERIALS AND METHODS

### Protein purification and labeling

Tau constructs were purified based on previously published protocols (15,16). Briefly, all variants were expressed with a cleavable N-terminal

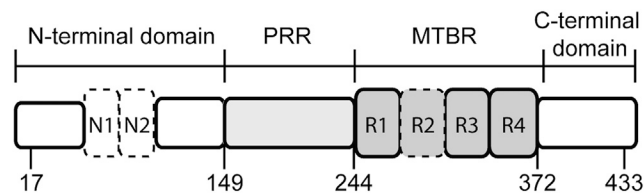

FIGURE 1 Tau schematic. The longest isoform of tau, 2N4R, is shown. Regions of interest indicated are the N-terminal domain, the proline rich region (PRR), the microtubule binding region (MTBR), and the C-terminal domain. The residues mutated to cysteine for labeling span these regions of interest and are indicated in the schematic. Alternative splicing of N1, N2, and R2 (marked with dashed lines) result in the six isoforms of tau found in human adults.

His-tag. After elution from a nickel column with 400 mM imidazole, the imidazole concentration was reduced through several buffer exchange cycles using Amicon concentrators (Millipore, Burlington, MA), and the protein was incubated with tobacco etch virus protease at 4°C overnight. After a second nickel column was used to remove the enzyme and the cleaved tag, the protein was further purified by size-exclusion chromatography on a HiLoad 16/600 Superdex 200 column (GE Life Sciences, Chicago, IL).

For site-specific labeling with fluorophores, QuikChange (Agilent Technologies, Santa Clara, CA) mutagenesis was used to change both native cysteines (C291 and C322) to serines and to introduce new cysteines at desired locations. For smFRET measurements, cysteines were chosen to span domains of interest as described in the manuscript. For FCS measurements, the protein was labeled with a single cysteine introduced near either the N- or C-terminus. For labeling, freshly purified tau was first reduced with 1 mM dithiothreitol for 10 min and buffer exchanged into a labeling buffer (20 mM Tris (pH 7.4), 50 mM NaCl, and 6 M guanidine HCl) using Amicon concentrators (17). For labeling with donor and acceptor fluorophores for smFRET, protein was incubated stirring at room temperature for an hour with donor fluorophore Alexa Fluor 488 maleimide (Invitrogen, Carlsbad, CA) at a 2:1 protein/dye ratio. The acceptor fluorophore, Alexa Fluor 594 maleimide, was then added in fivefold molar excess and incubated stirring overnight at 4°C. For single labeling for FCS, Alexa Fluor 488 maleimide was added in five-fold molar excess to protein and incubated overnight stirring at 4°C. Labeled protein was buffer exchanged into 20 mM Tris (pH 7.4) and 50 mM NaCl, and unreacted dye was removed by passing the solution over a HiTrap Desalting column (GE Life Sciences).

### Aggregation assays

Fibril formation of tau fragments was monitored using thioflavin T fluorescence. 25  $\mu$ M tau and 10  $\mu$ M thioflavin T were incubated in 40 mM potassium phosphate, 50 mM KCl (pH 7.5) at 37°C with 1 mM of different chain length of polyP (polyP kindly provided by T. Shiba (Regenetiss, Tokyo, Japan)) or 18  $\mu$ M heparin from porcine intestinal mucosa (molecular weight 17–20 kDa; Sigma-Aldrich, St. Louis, MO). The polyP concentration is in monomer phosphate units and the heparin concentration was chosen to match the amount of negative charge of the 1 mM polyP. Approximate equivalent charge concentrations of heparin were calculated assuming 1.5 to 2 charges and an average molecular weight of 665 g/mol per disaccharide (18). The samples were agitated for 10 s before every reading. The measurements were made in a black 96-well polystyrene microplate with clear bottom (Greiner Bio-One North America, Monroe, NC). Experiments were read in a Synergy HTX MultiMode Microplate Reader (Biotek, Winooski, VT) with an excitation wavelength of 430 nm and emission detected at 485 nm.

To ensure that the fluorophores did not interfere with the ability of tau to aggregate, two P2-4R constructs (C244–C372 and C291–C322) were labeled on both cysteines with Alexa Fluor 594 to minimize interference with the thioflavin T signal. Ensemble aggregation kinetics were measured using 95% unlabeled tau and 5% labeled tau; 100% unlabeled tau was used as a control (Fig. S1). After a plateau in the thioflavin T fluorescence was reached, the samples were centrifuged at 20,000  $\times$  g for 60 min to pellet the aggregates. The incorporation of fluorescently labeled protein into aggregates was calculated by quantifying the loss of fluorescence in the samples after centrifugation to remove the aggregates relative to an unaggregated sample (Fig. S1, a and b).

### Transmission electron microscopy of tau-polyP fibers

Samples from the thioflavin T aggregation assay were analyzed by transmission electron microscopy. A sample ( $\sim$ 5  $\mu$ L) was applied onto a thin, amorphous carbon-layered 400-mesh copper grid (Pelco, Fresno, CA) and incubated for 3 min before removing the liquid with filter paper. The grid was washed twice with 5  $\mu$ L ddH<sub>2</sub>O followed by two applications of

5  $\mu\text{L}$  0.75% uranyl formate (pH 5.5–6.0). The liquid was aspirated, with care taken to not disturb the sample. Grids were imaged at room temperature using a Morgagni microscope (FEI, Hillsboro, Oregon) operating at 100 kV. Images were acquired on a CCD camera at 22,000 $\times$  resulting in a sampling of 2.1  $\text{\AA}$ /pixel.

## smFRET instrument and data analysis

smFRET measurements were performed on a lab-built instrument based on an inverted Olympus IX-71 microscope (Olympus, Tokyo, Japan) (15,16). The laser power (488-nm diode-pumped solid-state laser; Spectra-Physics, Santa Clara, CA) was adjusted to 25–35  $\mu\text{W}$  before entering the microscope. Fluorescence emission was collected through the objective, and photons were separated by an HQ585LP dichroic in combination with ET525/50M and HQ600LP filters for the donor and acceptor photons, respectively (all filters and dichroics from Chroma Technology, Rockingham, VT). Fluorescence signals were collected by 100  $\mu\text{m}$  diameter aperture fibers (OzOptics, Carp, Ontario, Canada) coupled to avalanche photodiodes (Perkin-Elmer, Waltham, MA). Photon traces were collected in 1-ms time bins for an hour.

All measurements were carried out at a protein concentration of  $\sim 30$  pM at 20°C in 40 mM potassium phosphate, 50 mM KCl buffer (pH 7.4) in eight-chambered Nunc coverslips (Thermo Fisher Scientific, Waltham, MA) passivated with poly(ethylene glycol) poly(L-lysine) to reduce protein and polyP adsorption to the chamber.

To discriminate photon bursts of real events from background noise, a threshold of 30 counts/ms for the sum of the donor and acceptor channels was applied (14). Measurements were made of polyP samples in the absence of tau to determine the background signal (see Eq. 2 below) as well as any spurious contribution to smFRET events. No photon bursts (as defined by the criteria above) were observed for hour-long measurements of 20  $\mu\text{M}$  polyP.

The photon traces were analyzed using MATLAB (The MathWorks, Natick, MA)-based lab-written software. For each event, the energy transfer efficiency ( $ET_{\text{eff}}$ ) value was calculated from the following:

$$ET_{\text{eff}} = \frac{I_a - \beta I_d}{(I_a - \beta I_d) + \gamma(I_d + \beta I_d)}, \quad (1)$$

where  $I_a$  and  $I_d$  are the fluorescence intensities collected in the acceptor and donor channels, respectively.  $\beta$  accounts for fluorescence from the donor fluorophore on the acceptor channel and is measured each day varying between 0.7 and 0.85 for both the home-built and commercial systems.  $\gamma$  accounts for differences in detection efficiency and quantum yield for acceptor and donor fluorophores (19) and is measured every few months;  $\gamma$  values used on the lab-built system were 1.36, 1.20, and 1.00 (changes in  $\gamma$  occurred after major realignments or other adjustments to the instrument) and were 1.20 and 1.08 on the commercial PicoQuant instrument (Berlin, Germany) (value changed after reinstalling the laser and realigning the system). These individual  $ET_{\text{eff}}$  values were compiled into histograms and fit by multipeak Gaussian functions to determine properties of the distributions. We compared  $ET_{\text{eff}}$  histograms calculated with a correction for the background signal (Eq. 2; (14)) with those calculated without one (Eq. 1) as in the following:

$$ET_{\text{eff}} = \frac{(I_a - B_a) - \beta(I_d - B_d)}{((I_a - B_a) - \beta(I_d - B_d)) + \gamma((I_d - B_d) + \beta(I_d - B_d))}. \quad (2)$$

Fitting of the histograms yielded equivalent mean  $ET_{\text{eff}}$  values (Fig. S2).

Double labeling of the proteins usually yields a mixture of labeled proteins with donor-only, acceptor-only, and donor-acceptor populations.

The donor- and acceptor-only labeled are easily separated in analysis. Donor-only-labeled protein contributes to the “zero-peak” ( $ET_{\text{eff}} = 0$ ), and acceptor-only-labeled proteins do not give rise to a signal because the acceptor is not directly excited (17).

For some constructs, the peak in the  $ET_{\text{eff}}$  histograms arising from tau had low values,  $<0.2$ , that overlapped significantly with the  $ET_{\text{eff}} = 0$  peak, such that accurate fitting of the tau peak position was not possible. For these constructs, direct excitation of the acceptor fluorophore was used to discriminate between low  $ET_{\text{eff}}$  events from tau and those associated with the  $ET_{\text{eff}} = 0$  peak (20). Measurements were made in pulsed interleaved excitation FRET (PIE-FRET) mode on a MicroTime 200 inverse time-resolved confocal microscope (PicoQuant). Laser power from 485 and 560 nm lasers pulsed at 40 MHz, were adjusted to be  $\sim 30$   $\mu\text{W}$  before entering the microscope. Fluorescence emission was collected through the objective and passed through a 100  $\mu\text{m}$  pinhole. Photons were separated by an HQ585LP dichroic in combination with ET525/50M and HQ600LP filters and collected on photodiodes.  $ET_{\text{eff}}$  and stoichiometry factors were calculated using SymPhoTime 64 software and the resultant histograms were fit using Gaussian distributions as described above. Both the lab-built and MicroTime 200 instruments were calibrated using 10, 14, and 18 base-pair double-stranded DNA standards.

Measurements were made using a “saturating” concentration of polyP, defined as a concentration in which the addition of more polyP does not cause additional changes to the  $ET_{\text{eff}}$  histograms. This concentration was determined by a titration of polyP<sub>60</sub> and polyP<sub>300</sub> against a tau construct probing the PRR and MTBR ( $\tau_{\text{C149-C372}}$ ) in the 4R isoform (Fig. S3). The addition of polyP resulted in the disappearance in the peak in the  $ET_{\text{eff}}$  histogram from unbound tau concomitant with the appearance of a peak corresponding to polyP-bound tau (Fig. S3). Binding curves were constructed by calculating the areas of the histograms corresponding to unbound and bound tau, which were fit to extract an approximate binding affinity using the following:

$$Y = \frac{Y_{\text{max}}[X]}{K_D + [X]}, \quad (3)$$

where  $Y$  is the area of the fraction bound,  $Y_{\text{max}}$  is the maximal saturation ( $= 1.0$ ),  $K_D$  is the apparent dissociation constant, and  $X$  is the concentration of polyP by monomer  $P_i$  unit (Fig. S3). A subset of polyP<sub>300</sub> concentrations was also measured for 4R tau<sub>17-149</sub> and 3R isoform of tau<sub>149-372</sub>. For some of the tau constructs and polyP chain lengths, the polyP-bound peak was fully populated by 5  $\mu\text{M}$  polyP (Fig. S3). However, for all of the constructs measured, peak positions were stable after 20  $\mu\text{M}$  polyP; this concentration was chosen for “saturation” measurements.

## FCS instrument and data analysis

On the lab-built instrument, the laser power was adjusted to  $\sim 5$   $\mu\text{W}$  as measured before entering the microscope. Fluorescence emission was collected through the objective and separated from laser excitation using a Z488RDC long-pass dichroic and an HQ600/200M bandpass filter and focused onto a 50  $\mu\text{m}$  diameter optical fiber directly coupled to an avalanche photodiode. A digital correlator (FLEX03LQ-12, <http://correlator.com>) was used to generate the autocorrelation curves. All FCS

measurements were carried out at  $\sim 20$  nM protein at 20°C in PEG-PLL coated Nunc coverslips. For each measurement, 25 traces of 10 s were averaged to obtain statistical variations. The autocorrelation function  $G(\tau)$  is

calculated as a function of the delay time  $\tau$  and then fit to a diffusion equation using a single-component fit using lab-written scripts in MATLAB in the following:

$$G(\tau) = \frac{1}{N} \times \frac{1}{1 + \frac{\tau}{\tau_D}} \times \sqrt{\frac{1}{1 + \frac{\tau^2}{\tau_D^2}}}, \quad (4)$$

where  $N$  is the average number of molecules in the focal volume,  $s$  is the structure factor (ratio of radial to axial dimensions), and  $\tau_D$  is the translational diffusion time. Each measurement was repeated a minimum of three times to calculate  $\tau_D$  values, and the error is reported as mean  $\pm$  standard error (SEM). The normalized change in diffusion time was calculated as  $(\tau_{D,+polyP} - \tau_{D,-polyP})/\tau_{D,-polyP}$ . Some FCS measurements were carried out on the MicroTime 200 instrument and analyzed using the SymPhoTime 64 software.

Noncovalent cross-linking measurements were carried out using 25  $\mu$ M unlabeled 4R, 20 nM single-labeled 4R, and 1 mM polyP or 18  $\mu$ M heparin at 20°C. Triplicate measurements with 25 curves of 10 s were recorded immediately after mixing. The cross-linking FCS measurements were carried out at a lower temperature (20°C) than the aggregation assays (37°C). Aggregation occurs more slowly at lower temperatures such that it is unlikely that large fibrillar aggregates are formed during the duration of the FCS measurements.

## Competition assays

Tubulin was purified from bovine brain tissue using repeated cycles of polymerization and depolymerization in the presence of a high-molarity PIPES buffer (21). Before use, tubulin was clarified by centrifugation at 100,000  $\times$   $g$  and buffer exchanged into phosphate buffer.

Competitive binding of tubulin and polyP to tau was measured by FCS.  $\sim$ 20 nM P2-4R was incubated with 5  $\mu$ M tubulin for 5 min at 20°C. PolyP<sub>300</sub> was added to the tau-tubulin sample at concentrations ranging from 5 to 100  $\mu$ M and incubated for 5 min before measurement. For each measurement, 25 curves of 10 s were recorded and analyzed with a single-component fit (Eq. 4 above) using lab-written scripts in MATLAB. Measurements were repeated in triplicate.

## Statistical analysis

Data are presented as SEM. Statistical significance was calculated using unpaired two-tailed tests with  $p < 0.05$  considered significant with a minimum of  $n = 3$  for FRET, FCS, and aggregation assays. The SEM for the change in diffusion time was calculated from repeats of the measurements (Fig. 3). The SEM for change in  $ET_{eff}$  (Tables S1, S3, S4, and S6) was calculated by propagation of error using  $(x_1^2 + x_2^2)^{1/2}$ , where  $x_1$  and  $x_2$  are the SEM of tau in the absence and presence of polyP, respectively.

## RESULTS

Functionally, tau can be divided into four major domains (Fig. 1). The function of the N-terminal domain is the least well understood, although it has been proposed to regulate binding to microtubules (22) as well as to interact with neuronal membranes (23). The MTBR binds both microtubules and soluble tubulin (24,25) and forms the core of paired helical filaments. Binding of tau to microtubules is enhanced by the regions directly flanking both sides of the MTBR (26,27). Alternate splicing of the second repeat (R2) in the MTBR gives rise to isoforms with either three (3R) or four

(4R) repeat regions and either zero (0N), one (1N), or two (2N) N-terminal inserts (Fig. 1) (28). The 3R and 4R isoforms have different binding affinities (29) and assembly activities (30) for microtubules. One of the two hexapeptide sequences that play a crucial role in tau aggregation is located in the R2. Because this region is absent in 3R isoforms, 4R isoforms are generally more aggregation prone (31,32).

Changes to the conformations of each of the domains caused by polyP binding to tau were probed with smFRET. For site-specific labeling of tau in these measurements, cysteine residues were introduced at desired labeling positions in the 2N4R and 2N3R isoforms of tau (Fig. 1; details in Materials and Methods). The labeling positions were chosen to span either the entire protein (C17–C433) or specific regions (all residue numbering throughout is based on the 2N4R isoform): the N-terminal domain (C17–C149), PRR and MTBR (C149–C372), or the C-terminal domain (C372–C433). The donor and acceptor fluorophores were Alexa Fluor 488 maleimide and Alexa Fluor 594 maleimide, respectively.

FRET efficiencies ( $ET_{eff}$ ) from individual photon bursts were calculated as a ratio of the intensity of the acceptor over the sum of the intensities of the donor and acceptor (see Materials and Methods for details and correction factors). Higher  $ET_{eff}$  values correspond to shorter distances between the donor and acceptor dyes, whereas lower  $ET_{eff}$  values reflect longer distances.  $ET_{eff}$  values were plotted as histograms and fit with a sum of Gaussian distributions to determine the peak  $ET_{eff}$  positions (Fig. 2). As an intrinsically disordered protein, tau populates an ensemble of conformations. For simplicity and convenience in comparing FRET measurements of different tau constructs or under different experimental conditions, we use the mean  $ET_{eff}$  obtained from fitting to reflect the average of tau's conformational ensemble for a given measurement. Measurements were made in the absence (Fig. 2, dashed lines) or presence of polyP<sub>300</sub> (average of 300 phosphate units per polymer) (Fig. 2, solid lines); polyP concentrations are given in monomer  $P_1$  units.

## PolyP disrupts long-range intramolecular interactions in tau

In solution, tau is a compact protein despite its length and intrinsic disorder, with the N- and C-termini in relatively close proximity to the MTBR (15). 2N3R is 31 residues shorter than 2N4R because of the absence of R2; thus, differences in the measured  $ET_{eff}$  between the two isoforms for constructs that span this region, namely, tau<sub>C149–C372</sub> (MTBR and PRR) and tau<sub>C17–C433</sub> (entire protein), are expected and observed (Fig. 2; Table S1). Interestingly, the construct probing the C-terminal domain tau<sub>C372–C433</sub>, which is identical in both isoforms, shows a lower  $ET_{eff}$  for 2N3R than 2N4R, reflecting a more extended conformational ensemble for 2N3R. One possible explanation is that



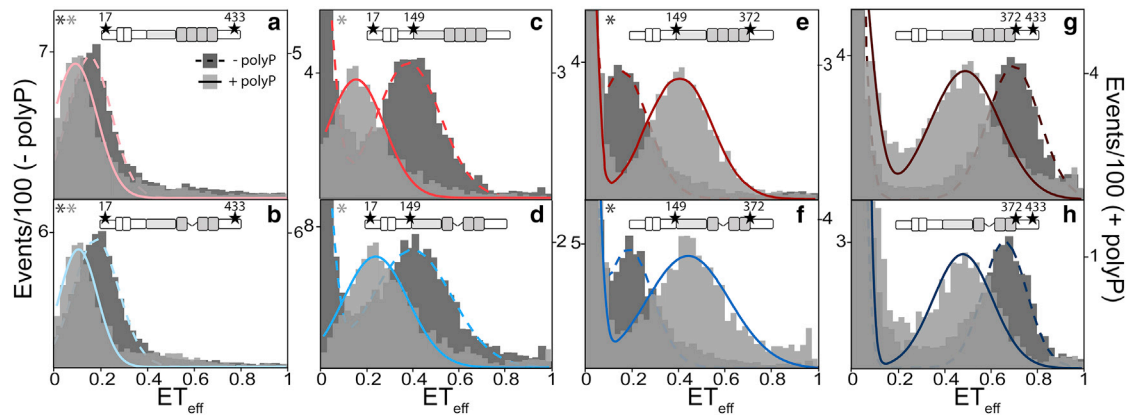

**FIGURE 2** PolyP disrupts long-range interactions and compacts the PRR and MTBR of tau. Histograms from smFRET measurements of 2N4R (upper panels) and 2N3R (lower panels) tau in the absence (dark gray and dashed line; left axis) and presence (light gray and solid line; right axis) of 20  $\mu$ M polyP<sub>300</sub>. Labeling positions are chosen to probe the entire protein (C17–C433: *a* and *b*), the N-terminal domain (C17–C149: *c* and *d*), the PRR and MTBR (C149–C372: *e* and *f*), and the C-terminal domain (C372–C433: *g* and *h*). The numbers are the labeling positions by residue number based on 2N4R. Tau schematics above each histogram represent the isoform and labeling positions. Measurements carried out in PIE-FRET as described in the [Materials and Methods](#) are marked with an asterisk (dark/light gray in the absence/presence of polyP) on the top left corner. At least three separate measurements of each condition/construct were made. The histograms shown are representative. The statistical analysis of repeat measurements is given in [Table S1](#). To see this figure in color, go online.

attractive electrostatic interactions between the C-terminal domain and the MTBR are weakened by the absence of R2.

The addition of polyP<sub>300</sub> resulted in an increase in the average end-to-end distance of tau as reflected by the decrease in  $ET_{\text{eff}}$  for both 2N4R ([Fig. 2 a](#)) and 2N3R ([Fig. 2 b](#)) tau<sub>C17–C433</sub> ([Table S1](#)). These results suggested that polyP disrupts some of the long-range electrostatic interactions that are responsible for tau's relatively compact conformational ensemble in solution. We also noted a similar polyP-mediated population of lower  $ET_{\text{eff}}$  values, namely, larger distances, for both isoforms when the N- and C-terminal domains were probed independently, using tau<sub>C17–C149</sub> or tau<sub>C372–C433</sub>, respectively ([Fig. 2, c, d, g, and h](#); [Table S1](#)). In contrast, tau<sub>C149–C372</sub>, which probes the region encompassing the PRR and MTBR, showed a relatively large shift to higher  $ET_{\text{eff}}$  values for both isoforms, reflecting significant compaction of this region ([Fig. 2, e and f](#); [Table S1](#)). Increasing the ionic strength of the buffer solution to 100 and 150 mM KCl eliminated the observed changes in the  $ET_{\text{eff}}$  histograms for 2N4R tau<sub>C17–C149</sub> and tau<sub>C149–C372</sub> at 20  $\mu$ M polyP<sub>300</sub> ([Fig. S4](#)). However, increasing the concentration of polyP<sub>300</sub> to 1 mM resulted in population of the polyP-bound peak ([Fig. S4](#)). These data support an important role for electrostatic interactions in polyP binding to tau. As a whole, these results are similar to our previous work on tau-heparin interactions (15), suggesting that there are conserved features in the aggregation-prone conformational ensemble of full-length monomer tau in the presence of polyanionic aggregation inducers.

### PolyP binds to the PRR and MTBR

The MTBR carries an effective net charge of +10.2 and +7.1 at pH 7.4 in the 2N4R and 2N3R isoforms, respec-

tively, whereas the PRR has a net charge of +13.8. Thus, our expectation was that the negatively charged polyP binds to these domains and that changes in the conformational ensembles in other regions of the protein may result from screening of the positive MTBR and PRR by the anionic polyP. For example, binding of polyP to the MTBR or PRR may disrupt the long-range interactions with the negatively charged N-terminal domain, thereby altering its conformational ensemble even if polyP does not bind directly to the N-terminal domain. To identify the regions of tau involved in polyP binding, we made six tau fragments ([Fig. 3](#)): 4R and 3R, which correspond to the MTBR (residues 244–372) of 2N4R and 2N3R, respectively; P1P2, which is the entire PRR (residues 148–245); P2-4R and P2-3R, which contain 4R and 3R as well the second half of the PRR (residues 198–372); and NT, which corresponds to the N-terminal domain (residues 1–152). The fragments and full-length tau constructs were labeled with a single fluorophore, and FCS was used to measure their diffusion times in the absence or presence of polyP<sub>14</sub> or polyP<sub>300</sub>. A change in mass or hydrodynamic radius of tau upon binding polyP is expected to result in a change in tau's diffusion time ([Fig. S5](#); details in [Materials and Methods](#)). All constructs except for NT (which showed no change) exhibited an increase in diffusion time ranging from 11 to 24% in the presence of polyP<sub>300</sub> relative to the diffusion time of the construct in the absence of polyP<sub>300</sub>, indicative of polyP binding ([Fig. 3](#); [Table S2](#)). The two fragments lacking R2 in their MTBRs (i.e., P2-3R and 3R), however, reproducibly showed less of an increase in diffusion time upon binding polyP than their 4R counterparts (i.e., P2-4R and 4R), suggesting that presence of R2 enhances the interactions with polyP ([Fig. 3](#)). Moreover,

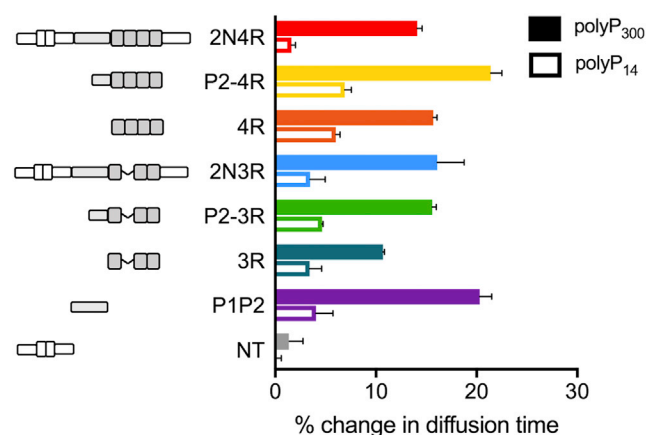

FIGURE 3 PolyP binds to the PRR and MTBR. Change in diffusion times of single-labeled tau constructs with the addition of 20  $\mu$ M polyP<sub>300</sub> (solid bars) or polyP<sub>14</sub> (open bars) as measured by FCS. The change is shown as the increase relative to each construct in the absence of polyP. The results are the average of three separate measurements, and error bars show SEM as described in [Materials and Methods](#). The changes in diffusion time between 4R and 3R and P2-3R and 3R are significant ( $p = 0.016$  and  $p = 0.05$ , respectively). The statistical analysis of repeat measurements is given in [Table S2](#). To see this figure in color, go online.

addition of the shorter polyP<sub>14</sub> caused similar increases in the diffusion times, although of smaller magnitudes than observed for polyP<sub>300</sub> (Fig. 3). Based on these results, we concluded that polyP binds to both the PRR and MTBR. In addition, the observed lack of polyP binding to the NT indicated that the large conformational changes that we observed when we probed the N-terminal domain in the context of the full-length protein tau<sub>C17-C149</sub> (Fig. 2, *c* and *d*) are not due to direct binding of polyP to this domain but caused by an overall reconfiguration of tau's conformational ensemble upon binding of polyP to the PRR and MTBR.

To understand the relationship between polyP's binding to the PRR and MTBR and the conformational changes that we observed by smFRET (Fig. 2), we conducted smFRET measurements focusing on either the MTBR (Fig. 4, *a-c* for 4R; Fig. 4, *d-f* for 3R) or the PRR (Fig. 4, *g-i*) in the context of the full-length constructs or select fragments. In the absence of polyP, the fragments generally showed higher mean  $ET_{\text{eff}}$  values than the full-length proteins, indicating that the flanking regions of the protein impact the conformational ensembles sampled by the various domains even in solution (Fig. 4, *dashed lines*; [Table S3](#)). Full-length tau<sub>C244-C372</sub> constructs exhibited a large shift to higher  $ET_{\text{eff}}$  upon binding polyP, reflecting a polyP-induced compaction of the MTBR (Fig. 4, *a* and *d*; [Table S3](#)). We observed similar results for P2-4R<sub>C244-C372</sub> and P2-3R<sub>C244-C372</sub> constructs (Fig. 4, *b* and *e*; [Table S3](#)), although the magnitudes of the shifts were not as great as those seen in the full-length proteins. Interestingly, polyP did not cause any significant shifts in the  $ET_{\text{eff}}$  values in either of the isolated MTBR fragments, 4R<sub>C244-C372</sub> or

3R<sub>C244-C372</sub> (Figs. 4, *c* and *f* and [S6](#); [Table S3](#)) despite clear evidence of binding to this region as measured by FCS (Fig. 3). However, comparison of the  $ET_{\text{eff}}$  histograms revealed that binding of polyP to both the full-length tau or the shorter P2-4R<sub>C244-C372</sub> and P2-3R<sub>C244-C372</sub> constructs shifts their peak positions close to those of the isolated MTBR fragments, 4R<sub>C244-C372</sub> or 3R<sub>C244-C372</sub>. These results suggest that the MTBR fragments in isolation populate a compact monomer conformational ensemble that is only achieved in the longer tau constructs through binding of polyP. Because isolated MTBR fragments aggregate more readily than full-length tau (31), our results suggest that compaction of this domain may play a role, reflecting one mechanism by which polyP accelerates tau aggregation.

SmFRET measurements of the other tau fragments were consistent with FCS measurements that showed binding to PIP2 but not NT. PolyP binding to the isolated PRR PIP2<sub>C149-C244</sub> caused a shift to higher  $ET_{\text{eff}}$  (Fig. 4 *i*; [Table S3](#)), although not as great as seen in full-length tau<sub>C149-C244</sub> (Fig. 4, *g* and *h*; [Table S3](#)). No shift in  $ET_{\text{eff}}$  was detected in the isolated N-terminal fragment, NT<sub>C17-C149</sub> (Fig. [S6](#); [Table S3](#)).

### PolyP enhances tau aggregation through intermolecular cross-linking

In vivo, polyP exists as a broad range of polymer lengths (10), and our previous work with polyP revealed that longer chains are generally more effective at accelerating aggregation of amyloidogenic proteins than shorter ones (8). Tighter binding may be important to initiation of aggregation because tau binds with higher affinity to polyP<sub>300</sub> than polyP<sub>60</sub> (Fig. [S3](#)). To examine the relationship between polyP chain length, changes in the conformational ensemble of the monomer protein and aggregation propensity, we conducted smFRET measurements on select full-length 2N4R constructs, tau<sub>C17-C149</sub> (Fig. 5 *a*) and tau<sub>C149-C372</sub> (Fig. 5 *b*), in the presence of 20  $\mu$ M polyP<sub>14</sub>, polyP<sub>60</sub>, polyP<sub>130</sub> or polyP<sub>300</sub> ([Table S4](#)). In the presence of polyP<sub>14</sub>, tau<sub>C149-C372</sub> underwent a very small increase in  $ET_{\text{eff}}$ , whereas the tau<sub>C17-C149</sub> conformation appeared to be unchanged (Fig. 5; [Table S4](#)). This was despite the fact that polyP<sub>14</sub> binds to both the full-length protein as well as to the isolated fragments (Fig. 3). All other polyP chain lengths caused large shifts in the mean  $ET_{\text{eff}}$  for both tau<sub>C17-C149</sub> and tau<sub>C149-C372</sub> to the previously observed lower and higher values, respectively (Fig. 5; [Table S4](#)). This suggests that for longer polyP polymers, a single chain may be able to bind to multiple binding sites on tau to allow for intramolecular scaffolding resulting in a change in its conformational ensemble. When the chain is not long enough (i.e., polyP<sub>14</sub>) this effect is not observed.

Ensemble aggregation experiments were carried out for tau fragments in the presence of various chain lengths of polyP, resulting in characteristic fibrillar aggregates

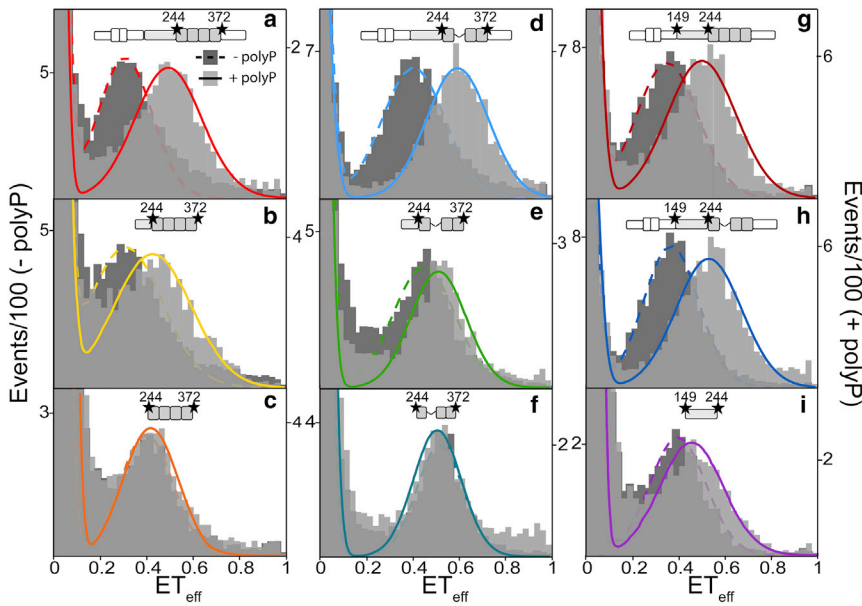

**FIGURE 4** PolyP binding induces conformational changes in the MTBR when the PRR is present. Histograms from smFRET measurements probing the MTBR and PRR in the absence (*dark gray and dashed line; left axis*) or presence (*light gray and solid line; right axis*) of 20  $\mu\text{M}$  polyP<sub>300</sub>. Histograms for probes of the MTBR (C244–C372) in 2N4R (a), P2-4R (b), 4R (c), 2N3R (d), P2-3R (e), and 3R (f). Histograms for probes of the PRR (C149–C244) for 2N4R (g), 2N3R (h), and PIP2 (i). Tau schematics above each histogram represent the construct and labeling positions. At least three separate measurements of each condition/construct were made. The histograms shown are representative. The statistical analysis of repeat measurements is given in [Table S3](#). To see this figure in color, go online.

([Fig. S7](#)). Aggregation was monitored by an increase in thioflavin T fluorescence and quantified by the  $T_{1/2}$ , the time to reach half the signal plateau ([Figs. 6](#) and [S1 c](#); [Table S5](#); details in [Materials and Methods](#)). Although an inverse relationship between the  $T_{1/2}$  and the length of polyP was observed for both 3R and 4R, all polyP chain lengths were more effective at inducing aggregation than heparin ([Fig. 6](#)). To illustrate, whereas the  $T_{1/2}$  of 4R was greater

than 15 h in the presence of heparin, it was less than 6 h in the presence of polyP<sub>14</sub> and less than 10 min in the presence of polyP<sub>300</sub>. Consistent with previous findings that the 4R fragment of tau is generally more aggregation prone than the 3R fragment ([33](#)) (e.g.,  $T_{1/2}$  of 15 h for 4R vs. 60 h for 3R in the presence of heparin), the influence of all polyP chains was accordingly less pronounced for the 3R fragment. Moreover, although polyP was effective in accelerating

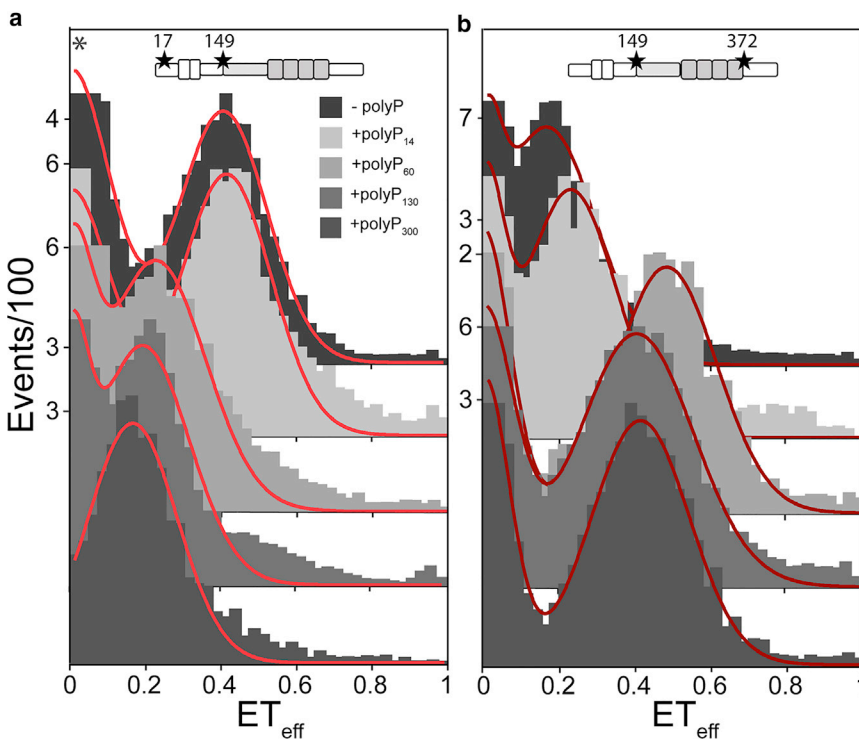

**FIGURE 5** Tau conformational changes are dependent upon polyP chain length. Histograms from smFRET measurements probing two different regions of 2N4R, the N-terminal domain (C17–C149) (a), and the PRR and MTBR (C149–C372) (b) in the absence or presence of 20  $\mu\text{M}$  polyP of different chain lengths. At least three separate measurements of each condition/construct were made. The histograms shown are representative. PIE-FRET was used for tau<sub>C17–C149</sub> with 20  $\mu\text{M}$  polyP<sub>300</sub> (\*). The statistical analysis of repeat measurements is given in [Table S4](#). To see this figure in color, go online.

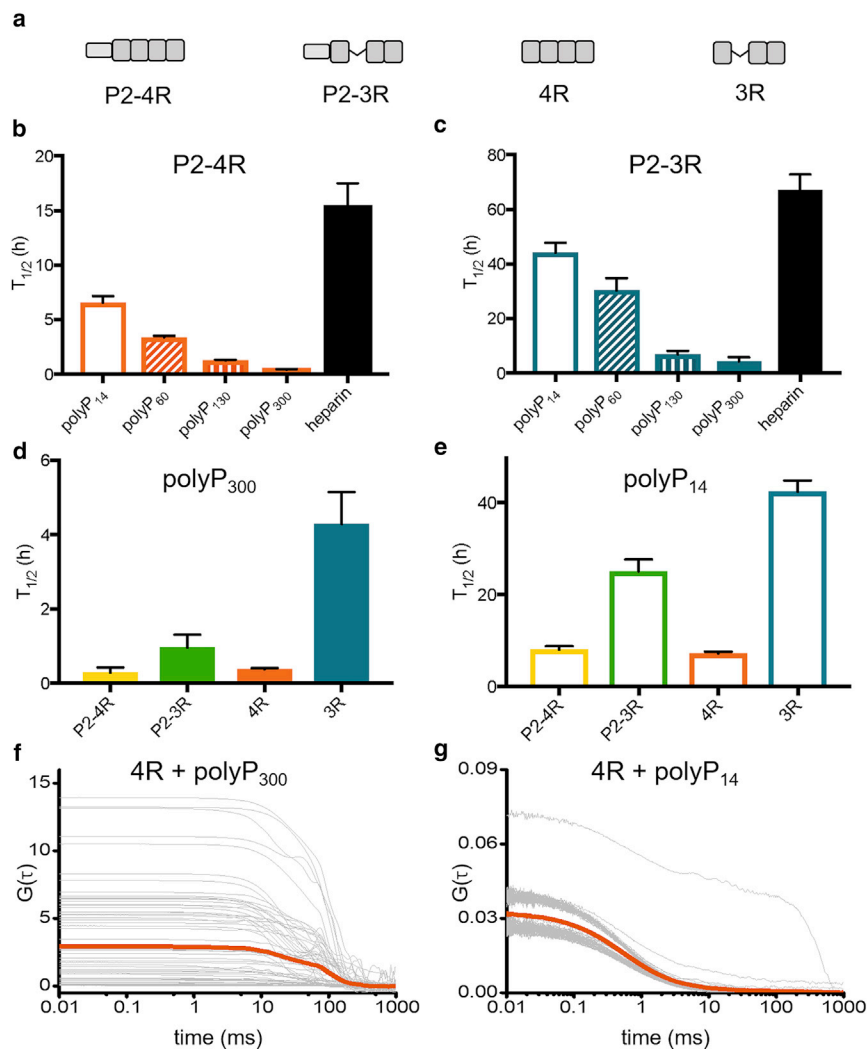

**FIGURE 6** PolyP accelerates tau aggregation in a chain-length-dependent manner. The time to reach half the signal plateau ( $T_{1/2}$ ) of tau fragments (*a*) measured by thioflavin T fluorescence comparing polyP chain lengths and heparin for 4R (*b*) and 3R (*c*) and comparing different fragments for polyP<sub>300</sub> (*d*) and polyP<sub>14</sub> (*e*). Autocorrelation curves of 4R in the presence of 1 mM polyP<sub>300</sub> (*f*) or polyP<sub>14</sub> (*g*). The individual autocorrelation curves are shown and their average is the thick line. The statistical analysis of repeat measurements for the thioflavin T fluorescence assays is given in [Table S5](#). To see this figure in color, go online.

the aggregation of the two 4R constructs (R4 and P2-R4), it was less effective at inducing aggregation of 3R as compared to P2-3R ([Fig. 6](#); [Table S5](#)). These data, along with the binding data shown in [Fig. 3](#), support the importance of polyP binding to both R2 and the PRR for effective acceleration of aggregation; constructs that contain either P2 (i.e., P2-3R), R2 (i.e., 4R), or both (i.e., P2-4R) aggregate significantly faster in the presence of polyP than 3R, which lacks both binding sites.

Our smFRET and aggregation data support the conclusion that binding of polyP to multiple intramolecular sites increases the efficacy of polyP in initiating tau aggregation. Moreover, our finding that longer polyP chains are more effective in stimulating tau aggregation suggest that longer polyP chains are able to interact with several tau monomers, thereby serving as an intermolecular scaffold to noncovalently cross-link tau monomers. FCS and smFRET measurements are typically carried out at picomolar to nanomolar protein concentrations, which strongly disfavor intermolecular protein interactions. To directly test whether polyP is

able to noncovalently cross-link tau monomers, we conducted FCS measurements at concentrations of 4R and polyP that are comparable to our ensemble aggregation experiments. The addition of 25  $\mu$ M unlabeled 4R to 20 nM labeled 4R did not result in a change in its diffusion time, indicating that tau-tau interactions are not favored at the increased protein concentration in the absence of polyP ([Fig. S8](#), *a* and *b*). With the addition of 1 mM polyP<sub>300</sub>, however, extremely heterogeneous autocorrelation curves were recorded, suggesting the formation of large oligomeric tau assemblies or aggregates ([Fig. 6f](#)) (7). These measurements clearly indicate multiple polyP binding sites in tau, also supported by the FCS measurements shown in [Fig. 3](#), as having only a single binding site would result in uniformly bright species and not give rise to heterogeneous autocorrelation curves (34). In contrast, the addition of 1 mM polyP<sub>14</sub> resulted in only a few aberrant autocorrelation curves, reflecting fewer large species ([Fig. 6g](#)). These results suggest that longer polyP chains enhance intermolecular tau-tau interactions, which might play an important role in the acceleration of tau aggregation.



### PolyP is more effective at accelerating tau aggregation than heparin

Heparin is the most commonly used inducer of tau aggregation *in vitro* (5). To investigate whether heparin and polyP trigger similar changes in the conformational ensemble of tau, we compared their effects on tau in smFRET experiments. We measured two 2N4R constructs, tau<sub>C17–C149</sub> and tau<sub>C149–C372</sub>, using concentrations of heparin (MW  $\sim 17,000 \times g$ ) of 130 nM and 1.75  $\mu\text{M}$ , which have the same equivalent charge as  $\sim 5 \mu\text{M}$  and 80  $\mu\text{M}$  polyP, respectively. At these concentrations, heparin induced shifts in the mean  $ET_{\text{eff}}$  in the same direction as polyP, although the magnitude of the shift was reproducibly smaller (Fig. 7; Table S6). Moreover, heparin does not appear to be as good a scaffold for binding multiple tau monomers (Fig. S8 c) as polyP<sub>300</sub>, and heparin-induced aggregation of tau displayed significantly slower kinetics than measured for polyP-induced aggregation of tau (Fig. 6, b and c). Together, these data demonstrate that compared to heparin, polyP is significantly more effective at 1) populating a more compact, aggregation-prone conformational ensemble of tau, 2) cross-linking multiple tau monomers, and consequently 3) inducing tau aggregation.

### PolyP competes with tubulin for tau binding

*In vitro*, polyP binds to tau and accelerates its aggregation. In neurons, there are many other biomolecules that can compete with polyP for binding to tau. The most relevant of these is tubulin, tau's primary cellular binding partner.

We therefore decided to investigate whether polyP is a competitive binding partner of tau that is capable of affecting tau's ability to interact with tubulin *in vitro*. For these experiments, we used the P2-4R fragment, which undergoes conformational changes (Fig. 4) and aggregates readily (Fig. 6) upon binding polyP and is known to interact with both soluble tubulin (35) and microtubules (36) *in vitro*. As a reporter for tubulin binding, we measured the diffusion time of fluorescently labeled P2-4R in the absence and presence of 5  $\mu\text{M}$  tubulin by FCS (Fig. 8 and S9). Consistent with our previous work, binding of P2-4R to tubulin resulted in an increase in the diffusion time from  $\sim 0.66$  to 0.93 ms (34). Upon titration with polyP<sub>300</sub>, we observed a polyP concentration-dependent decrease in the diffusion time, reflecting competitive displacement of tubulin from P2-4R by polyP (Fig. 8). In the presence of 100  $\mu\text{M}$  polyP<sub>300</sub>, the diffusion time of P2-4R was comparable to that measured for P2-4R with saturating concentrations of polyP in the absence of tubulin (Fig. 3), suggesting that polyP had effectively replaced all of the bound tubulin.

## DISCUSSION

Our results identified three aspects of the interaction between tau and polyP relevant to its mechanism of enhancing tau aggregation: 1) binding of polyP to tau's MTBR and PRR regions, which changes the conformational ensemble of monomer tau by causing compaction of those domains; 2) screening of electrostatic interactions between tau domains and disruption of long-range interactions between

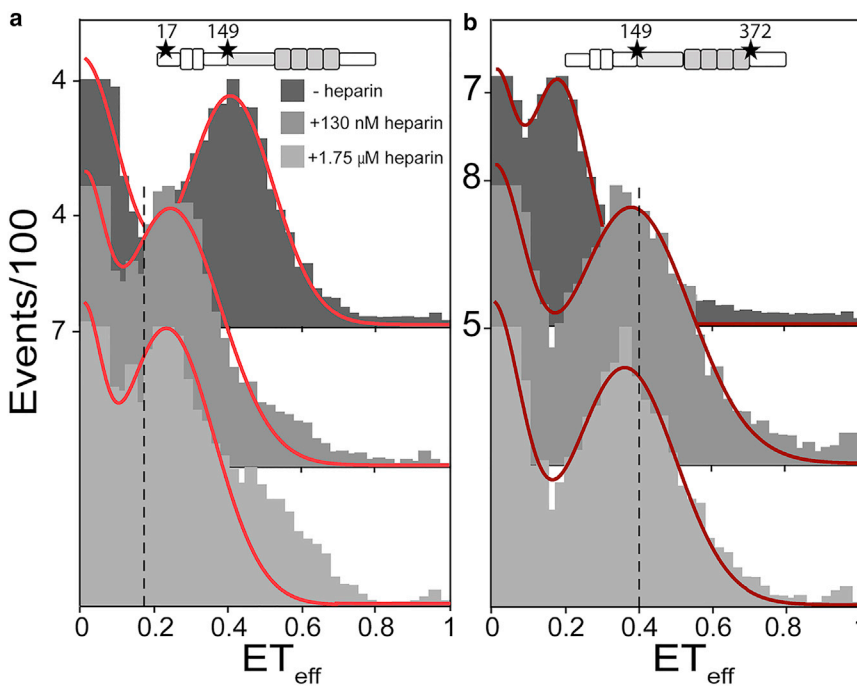

FIGURE 7 Heparin binding causes a smaller conformational change than polyP. Histograms from smFRET measurements probing two different regions of 2N4R, the N-terminal domain (C17–C149) (a) and the PRR and MTBR (C149–C372) (b) in the absence or presence of 130 nM or 1.75  $\mu\text{M}$  heparin. The dotted black lines indicate the average  $ET_{\text{eff}}$  of the construct with 20  $\mu\text{M}$  polyP<sub>300</sub>. At least three separate measurements of each condition and construct were made. The histograms shown are representative. The statistical analysis of repeat measurements is given in Table S6. To see this figure in color, go online.

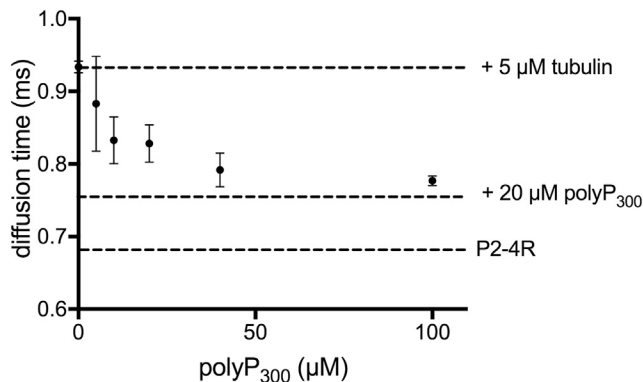

FIGURE 8 PolyP competes with tubulin for tau binding. FCS measurements of tubulin-bound P2-4R in the absence or presence of increasing concentrations of polyP<sub>300</sub>. For reference, the dashed lines correspond to the diffusion times measured for P2-4R with 5  $\mu$ M tubulin (upper), P2-4R with 20  $\mu$ M polyP<sub>300</sub> (middle), and P2-4R in buffer (lower). Data points are the SEM of three independent measurements.

tau's termini and MTBR; and 3) facilitating intermolecular association of tau monomers (Fig. 9).

SmFRET measurements of full-length tau constructs most clearly illustrated that polyP binding causes both local (compaction of the PRR and MTBR) and long-range (loss of interaction between the termini and central region) changes in tau's conformational ensembles (Fig. 2). We found that polyP binds to both PRR and MTBR regions, yet compaction of the MTBR domain is only observed in the presence of the PRR (compare Fig. 4, *b* and *c*). We reason that the observed changes in the conformational ensemble result from the noncovalent intramolecular cross-linking of binding sites in the PRR and MTBR by a single polyP chain (Fig. 9). Upon occupation of all possible binding sites on

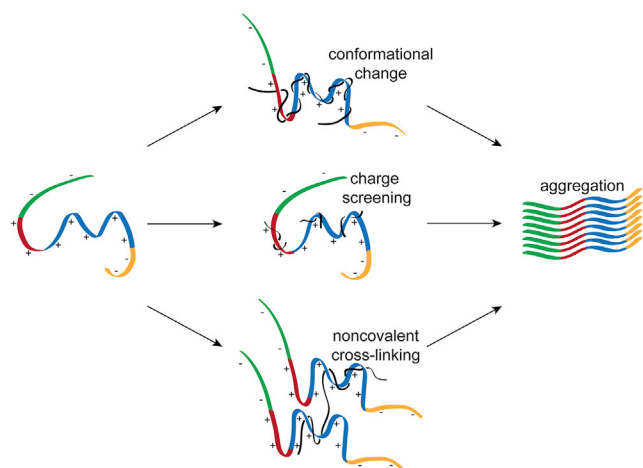

FIGURE 9 Proposed model of polyP-induced tau aggregation. The binding of polyP results in large conformational changes in monomer tau, charge screening, and non-covalent cross-linking between monomers. These combined effects result in the acceleration of tau aggregation. Tau domains are colored as N-terminal domain (green), PRR (red), MTBR (blue), and C-terminal domain (yellow). PolyP is shown in black.

tau, no further changes in conformation are observed. Further evidence in support of this idea came from the use of polyP of different chain lengths. Even at saturating concentrations, we found that polyP<sub>14</sub>, which is too short to span between binding sites in the PRR and MTBR (37), caused only a slight shift in the mean  $ET_{\text{eff}}$  of full-length tau (Fig. 5), whereas longer chain lengths (polyP<sub>60</sub>, polyP<sub>130</sub>, and polyP<sub>300</sub>) caused much larger shifts. Interestingly, the shift caused by polyP<sub>60</sub> is to a higher mean  $ET_{\text{eff}}$  value than that of polyP<sub>130</sub> and polyP<sub>300</sub> for tau<sub>C149-C372</sub> (Fig. 5 *b*). The shorter end-to-end distance of polyP<sub>60</sub> may not be able to span between binding sites without imposing a more compact conformational ensemble on tau. This effect is likely only seen for the tau<sub>C149-C372</sub> construct (Fig. 5 *b*), but not tau<sub>C17-C149</sub> (Fig. 5 *a*) because only the probes for the former encompass the PRR and MTBR binding sites.

We consider that both charge screening and intermolecular cross-linking are likely relevant to the general capability of polyP to accelerate tau aggregation. The tau fragments are highly positively charged, disfavoring intermolecular interactions in solution. Indeed, FCS measurements with high concentrations of unlabeled monomer 4R show no evidence of tau assembly under our solution conditions (Fig. S8 *a*). Binding of negatively charged polyP decreases the electrostatic repulsion between monomers so that intermolecular interactions become more favorable and binding of polyP to tau is effectively blocked by increasing the buffer ionic strength (Fig. S4). Although all polyP chain lengths are capable of accelerating aggregation through this mechanism (Fig. 6 *b*), longer polyP are more effective because they are also capable of facilitating binding to multiple tau monomers, increasing their local concentration (Figs. 6, *f* and *g* and 9). The fact that polyP results in the most rapid acceleration of aggregation of tau fragments that contain both P2 in the PRR and R2 in the MTBR suggests that the presence of additional binding sites may facilitate intermolecular scaffolding by polyP.

One challenge faced by *in vitro* aggregation studies is translating their results to a more physiological context. For example, although disease models generally describe alterations to tau (such as mutations found in tauopathies) as enhancing the aggregation propensity of tau, the effects *in vitro* are usually fairly moderate (1,38). Natively, tau is associated with either microtubules (36,39) or soluble tubulin (40), although this interaction is likely to be highly dynamic (25,26). We find that *in vitro* polyP is able to displace tubulin from tau (Fig. 8) at concentrations much lower than the reported cytosolic concentrations of polyP (41). However, the cellular cytoplasm is much more complex than the tertiary mixture explored here and, in addition to tubulin and polyP, there may be other charged molecules that compete for binding with tau. Thus, although we cannot extrapolate directly from our *in vitro* data to the cellular cytoplasm, our measurements suggest that polyP is capable

of binding tau in the presence of tubulin or microtubules. Moreover, under pathological conditions in which tau binding to microtubules is compromised by mutation or hyperphosphorylation (42), the cytoplasmic pool of tau available to interact with polyP is increased. Future studies will investigate whether tubulin-dissociated, polyP-bound monomer might be putative target for therapeutics (reviewed in (43)). Our results here provide insight into the conformational features of this monomer and may eventually aid in the design of therapeutics to combat tauopathies.

## SUPPORTING MATERIAL

Supporting Material can be found online at <https://doi.org/10.1016/j.bpj.2019.07.028>.

## AUTHOR CONTRIBUTIONS

S.P.W., J.L., U.J., and E.R. designed the experiments. S.P.W., H.E.M., J.L., P.H., and J.M. performed research and analyzed data. S.P.W., U.J., and E.R. wrote the manuscript.

## ACKNOWLEDGMENTS

We thank K.M. McKibben and H.Y.J. Fung for providing some of the single-labeled and unlabeled tau constructs.

This work was funded by the National Institute of Health grants AG053951 (to E.R.) and GM122506 and AG055090 (to U.J.), PhD fellowship of the Boehringer Ingelheim Fonds, Stiftung fuer medizinische Grundlagenforschung (to J.L.), and The Vagelos Program in the Molecular Life Sciences at the University of Pennsylvania (to H.E.M.).

## REFERENCES

- Lee, V. M., M. Goedert, and J. Q. Trojanowski. 2001. Neurodegenerative tauopathies. *Annu. Rev. Neurosci.* 24:1121–1159.
- Kempf, M., A. Clement, ..., R. Brandt. 1996. Tau binds to the distal axon early in development of polarity in a microtubule- and microfilament-dependent manner. *J. Neurosci.* 16:5583–5592.
- Kellogg, E. H., N. M. A. Hejab, ..., E. Nogales. 2018. Near-atomic model of microtubule-tau interactions. *Science.* 360:1242–1246.
- Santarella, R. A., G. Skiniotis, ..., A. Hoenger. 2004. Surface-decoration of microtubules by human tau. *J. Mol. Biol.* 339:539–553.
- Goedert, M., R. Jakes, ..., R. A. Crowther. 1996. Assembly of microtubule-associated protein tau into Alzheimer-like filaments induced by sulphated glycosaminoglycans. *Nature.* 383:550–553.
- King, M. E., T. C. Gambin, ..., L. I. Binder. 2000. Differential assembly of human tau isoforms in the presence of arachidonic acid. *J. Neurochem.* 74:1749–1757.
- Elbaum-Garfinkle, S., T. Ramlall, and E. Rhoades. 2010. The role of the lipid bilayer in tau aggregation. *Biophys. J.* 98:2722–2730.
- Creemers, C. M., D. Knoefler, ..., U. Jakob. 2016. Polyphosphate: a conserved modifier of amyloidogenic processes. *Mol. Cell.* 63:768–780.
- Gabel, N. W., and V. Thomas. 1971. Evidence for the occurrence and distribution of inorganic polyphosphates in vertebrate tissues. *J. Neurochem.* 18:1229–1242.
- Kumble, K. D., and A. Kornberg. 1995. Inorganic polyphosphate in mammalian cells and tissues. *J. Biol. Chem.* 270:5818–5822.
- Chirita, C. N., E. E. Congdon, ..., J. Kuret. 2005. Triggers of full-length tau aggregation: a role for partially folded intermediates. *Biochemistry.* 44:5862–5872.
- Mirbaha, H., D. Chen, ..., M. I. Diamond. 2018. Inert and seed-competent tau monomers suggest structural origins of aggregation. *eLife.* 7:e36584.
- Schwalbe, M., V. Ozenne, ..., M. Blackledge. 2014. Predictive atomic resolution descriptions of intrinsically disordered hTau40 and  $\alpha$ -synuclein in solution from NMR and small angle scattering. *Structure.* 22:238–249.
- Trexler, A. J., and E. Rhoades. 2010. Single molecule characterization of  $\alpha$ -synuclein in aggregation-prone states. *Biophys. J.* 99:3048–3055.
- Elbaum-Garfinkle, S., and E. Rhoades. 2012. Identification of an aggregation-prone structure of tau. *J. Am. Chem. Soc.* 134:16607–16613.
- Melo, A. M., J. Coraor, ..., E. Rhoades. 2016. A functional role for intrinsic disorder in the tau-tubulin complex. *Proc. Natl. Acad. Sci. USA.* 113:14336–14341.
- Melo, A. M., S. Elbaum-Garfinkle, and E. Rhoades. 2017. Insights into tau function and dysfunction through single-molecule fluorescence. *Methods Cell Biol.* 141:27–44.
- Heuck, C. C., U. Schiele, ..., E. Ritz. 1985. The role of surface charge on the accelerating action of heparin on the antithrombin III-inhibited activity of alpha-thrombin. *J. Biol. Chem.* 260:4598–4603.
- Roy, R., S. Hohng, and T. Ha. 2008. A practical guide to single-molecule FRET. *Nat. Methods.* 5:507–516.
- Hendrix, J., and D. C. Lamb. 2013. Pulsed interleaved excitation: principles and applications. *Methods Enzymol.* 518:205–243.
- Castoldi, M., and A. V. Popov. 2003. Purification of brain tubulin through two cycles of polymerization-depolymerization in a high-molarity buffer. *Protein Expr. Purif.* 32:83–88.
- Derisbourg, M., C. Leghay, ..., M. Hamdane. 2015. Role of the Tau N-terminal region in microtubule stabilization revealed by new endogenous truncated forms. *Sci. Rep.* 5:9659.
- Brandt, R., J. Léger, and G. Lee. 1995. Interaction of tau with the neural plasma membrane mediated by tau's amino-terminal projection domain. *J. Cell Biol.* 131:1327–1340.
- Cleveland, D. W., S. Y. Hwo, and M. W. Kirschner. 1977. Physical and chemical properties of purified tau factor and the role of tau in microtubule assembly. *J. Mol. Biol.* 116:227–247.
- Drechsel, D. N., A. A. Hyman, ..., M. W. Kirschner. 1992. Modulation of the dynamic instability of tubulin assembly by the microtubule-associated protein tau. *Mol. Biol. Cell.* 3:1141–1154.
- Gustke, N., B. Trinczek, ..., E. Mandelkow. 1994. Domains of tau protein and interactions with microtubules. *Biochemistry.* 33:9511–9522.
- Mukrasch, M. D., M. von Bergen, ..., M. Zweckstetter. 2007. The “jaws” of the tau-microtubule interaction. *J. Biol. Chem.* 282:12230–12239.
- Goedert, M., M. G. Spillantini, ..., R. A. Crowther. 1989. Multiple isoforms of human microtubule-associated protein tau: sequences and localization in neurofibrillary tangles of Alzheimer's disease. *Neuron.* 3:519–526.
- Goode, B. L., M. Chau, ..., S. C. Feinstein. 2000. Structural and functional differences between 3-repeat and 4-repeat tau isoforms. Implications for normal tau function and the onset of neurodegenerative disease. *J. Biol. Chem.* 275:38182–38189.
- Panda, D., J. C. Samuel, ..., L. Wilson. 2003. Differential regulation of microtubule dynamics by three- and four-repeat tau: implications for the onset of neurodegenerative disease. *Proc. Natl. Acad. Sci. USA.* 100:9548–9553.
- von Bergen, M., P. Friedhoff, ..., E. Mandelkow. 2000. Assembly of tau protein into Alzheimer paired helical filaments depends on a local sequence motif ((306)VQIVYK(311)) forming beta structure. *Proc. Natl. Acad. Sci. USA.* 97:5129–5134.
- Li, W., and V. M. Lee. 2006. Characterization of two VQIXK motifs for tau fibrillization in vitro. *Biochemistry.* 45:15692–15701.

33. Barghorn, S., and E. Mandelkow. 2002. Toward a unified scheme for the aggregation of tau into Alzheimer paired helical filaments. *Biochemistry*. 41:14885–14896.
34. Li, X. H., and E. Rhoades. 2017. Heterogeneous tau-tubulin complexes accelerate microtubule polymerization. *Biophys. J.* 112:2567–2574.
35. Elbaum-Garfinkle, S., G. Cobb, ..., E. Rhoades. 2014. Tau mutants bind tubulin heterodimers with enhanced affinity. *Proc. Natl. Acad. Sci. USA*. 111:6311–6316.
36. Trinczek, B., J. Biernat, ..., E. Mandelkow. 1995. Domains of tau protein, differential phosphorylation, and dynamic instability of microtubules. *Mol. Biol. Cell*. 6:1887–1902.
37. Strauss, U. P., E. H. Smith, and P. L. Wineman. 1953. Polyphosphates as polyelectrolytes. I. Light scattering and viscosity of sodium polyphosphates in electrolyte solutions. *J. Am. Chem. Soc.* 75:3935–3940.
38. Goedert, M., and R. Jakes. 2005. Mutations causing neurodegenerative tauopathies. *Biochim. Biophys. Acta*. 1739:240–250.
39. Weingarten, M. D., A. H. Lockwood, ..., M. W. Kirschner. 1975. A protein factor essential for microtubule assembly. *Proc. Natl. Acad. Sci. USA*. 72:1858–1862.
40. Sandoval, I. V., and J. S. Vandekerckhove. 1981. A comparative study of the in vitro polymerization of tubulin in the presence of the microtubule-associated proteins MAP2 and tau. *J. Biol. Chem.* 256:8795–8800.
41. Bru, S., J. Jiménez, ..., J. Clotet. 2016. Improvement of biochemical methods of polyP quantification. *Microb. Cell*. 4:6–15.
42. Brunden, K. R., J. Q. Trojanowski, and V. M. Lee. 2009. Advances in tau-focused drug discovery for Alzheimer's disease and related tauopathies. *Nat. Rev. Drug Discov.* 8:783–793.
43. Congdon, E. E., and E. M. Sigurdsson. 2018. Tau-targeting therapies for Alzheimer disease. *Nat. Rev. Neurol.* 14:399–415.



**Biophysical Journal, Volume 117**

**Supplemental Information**

**Polyphosphate Initiates Tau Aggregation through Intra- and Intermolecular Scaffolding**

**Sanjula P. Wickramasinghe, Justine Lempart, Hope E. Merens, Jacob Murphy, Philipp Huettemann, Ursula Jakob, and Elizabeth Rhoades**

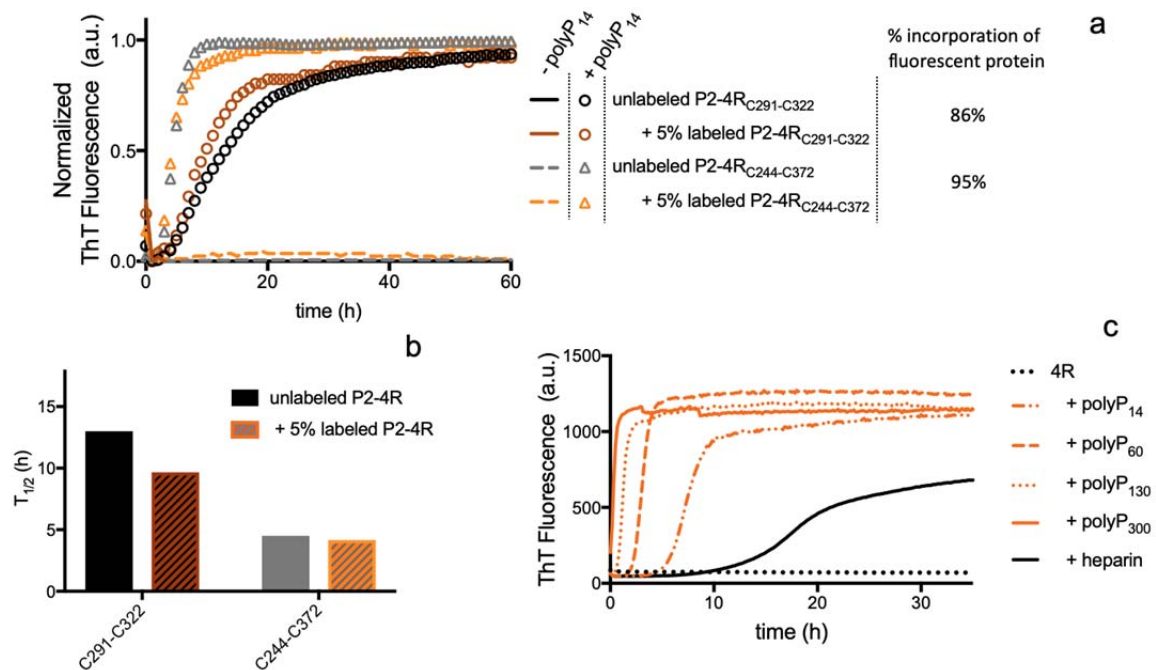

**Figure S1. Labeled tau is incorporated into aggregates.** Representative kinetic traces of ensemble aggregation measurements made using 100% unlabeled tau (black and gray) and 95 % unlabeled ta/5% fluorescently labeled tau (dark and light orange) in the absence or presence of 1 mM polyP<sub>14</sub> are shown (a). The incorporation of fluorescent into the aggregates is confirmed as described in the *Materials and Methods*. Kinetics were quantified by  $T_{1/2}$  (b). These experiments were carried out twice to ensure reproducibility. Representative kinetic traces of 4R aggregation as measured by an increase in Thioflavin T fluorescence for 25  $\mu$ M tau with 1 mM polyP or 18  $\mu$ M heparin (c).

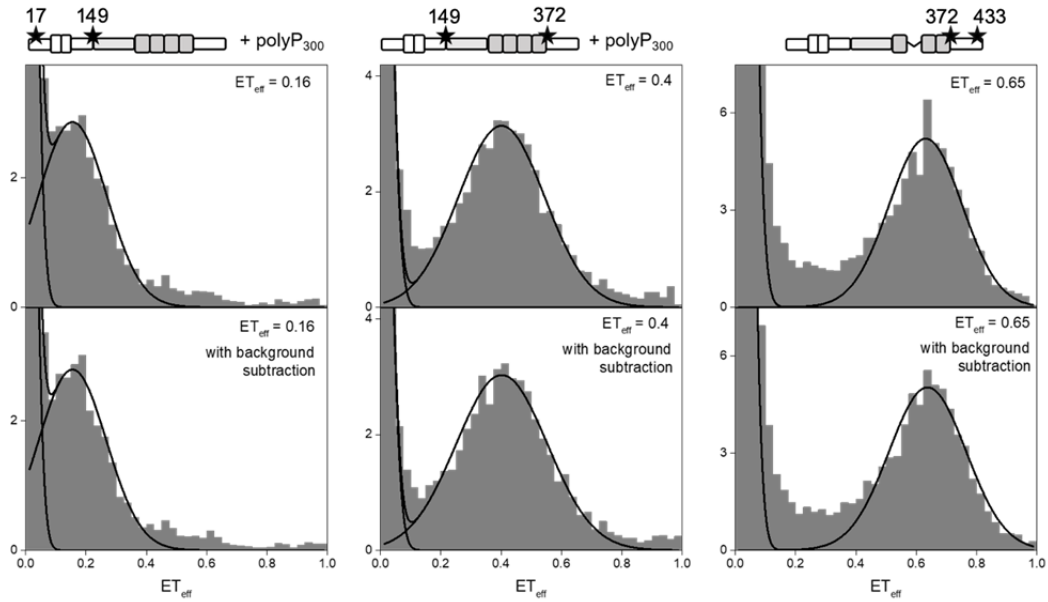

**Figure S2.  $ET_{\text{eff}}$  histograms without and with background subtraction.**  $ET_{\text{eff}}$  histograms for three different tau constructs without (upper) and with (lower) subtracting the average background signal from the individual events prior to calculating  $ET_{\text{eff}}$  as described in the *Materials & Methods*.

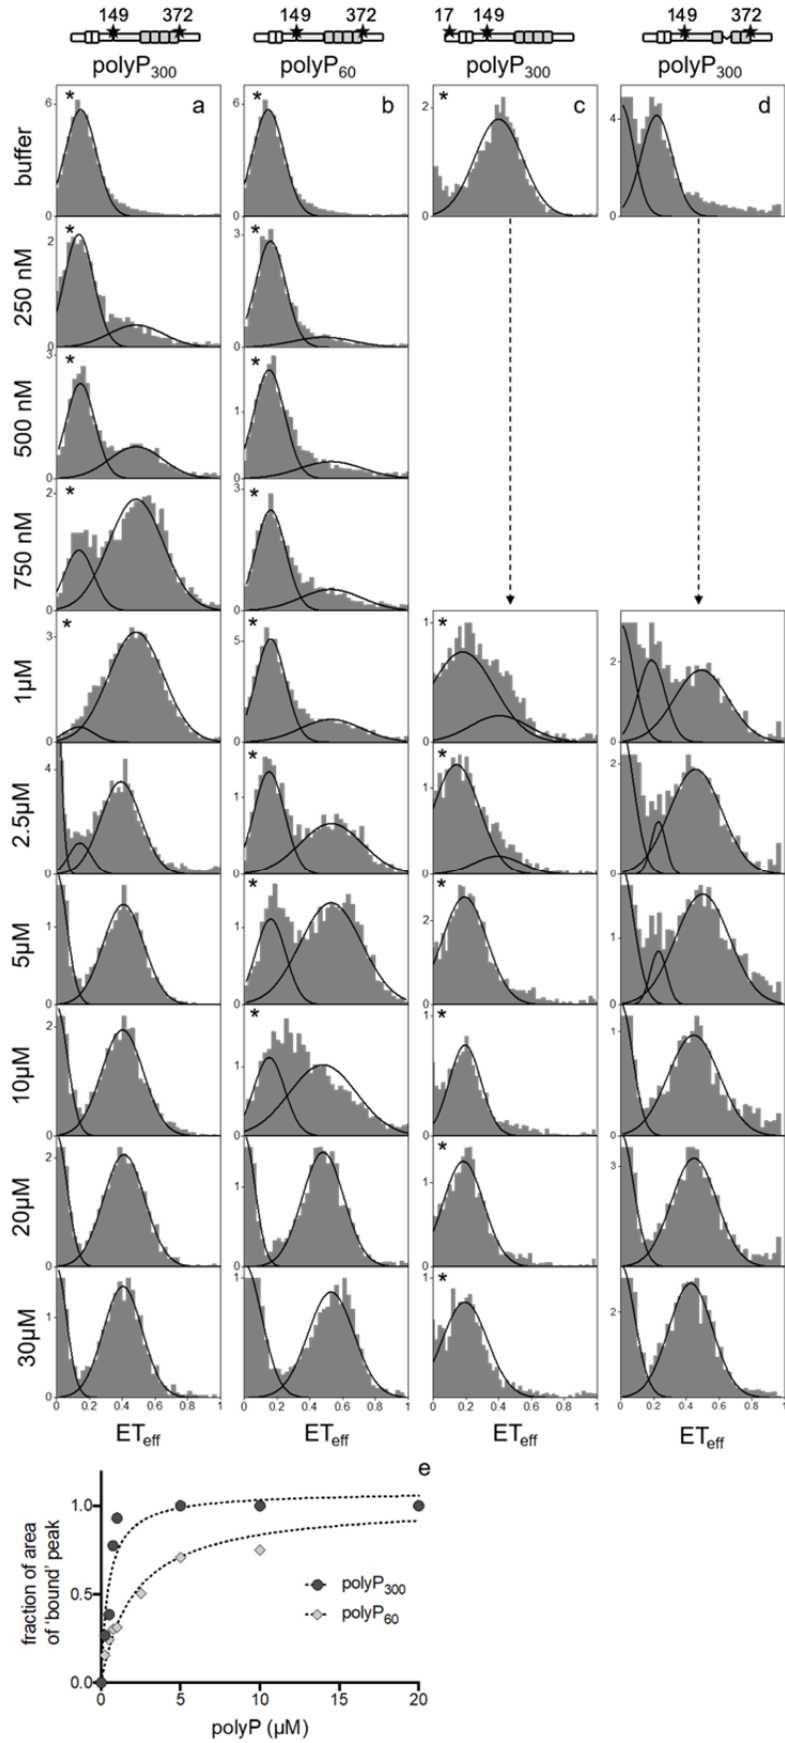



**Figure S3.  $ET_{\text{eff}}$  histograms as a function of polyP concentration. SmFRET**

measurements were made for 2N4R  $\tau_{\text{C149-C372}}$  with polyP<sub>300</sub> (a) or polyP<sub>60</sub> (b),  $\tau_{\text{C17-C149}}$  with polyP<sub>300</sub> (c) and 2N3R  $\tau_{\text{C149-C372}}$  with polyP<sub>300</sub> (d). PolyP concentrations ranged from 0 (top row) to 30  $\mu\text{M}$  (bottom row). All histograms converged to single peaks before or at 20  $\mu\text{M}$  polyP and no significant shifts in  $ET_{\text{eff}}$  were observed at higher concentrations of polyP. For calculation of binding curves, the center for the bound and unbound peaks were determined at limiting concentrations and fixed for intermediate concentrations when possible. Note that at high polyP concentrations (i.e. 20  $\mu\text{M}$ ) the polyP-bound peak is shifted from the polyP-bound peak at lower polyP concentrations (i.e. 20  $\mu\text{M}$ ). This likely reflects low affinity interactions between tau and polyP, as seen previously with heparin. The fraction of tau with polyP-bound (e) is calculated as the area of the bound peak over the total area of the bound and unbound peaks. These curves are fit with a hyperbolic binding equation to yield approximate  $K_D$ 's for polyP<sub>300</sub> (~0.4  $\mu\text{M}$  monomer or 1.3 nM chain) and polyP<sub>60</sub> (~2  $\mu\text{M}$  or 33 nM chain). An asterisk in the left hand corner of a panel indicates the measurement was made using PIE-FRET.

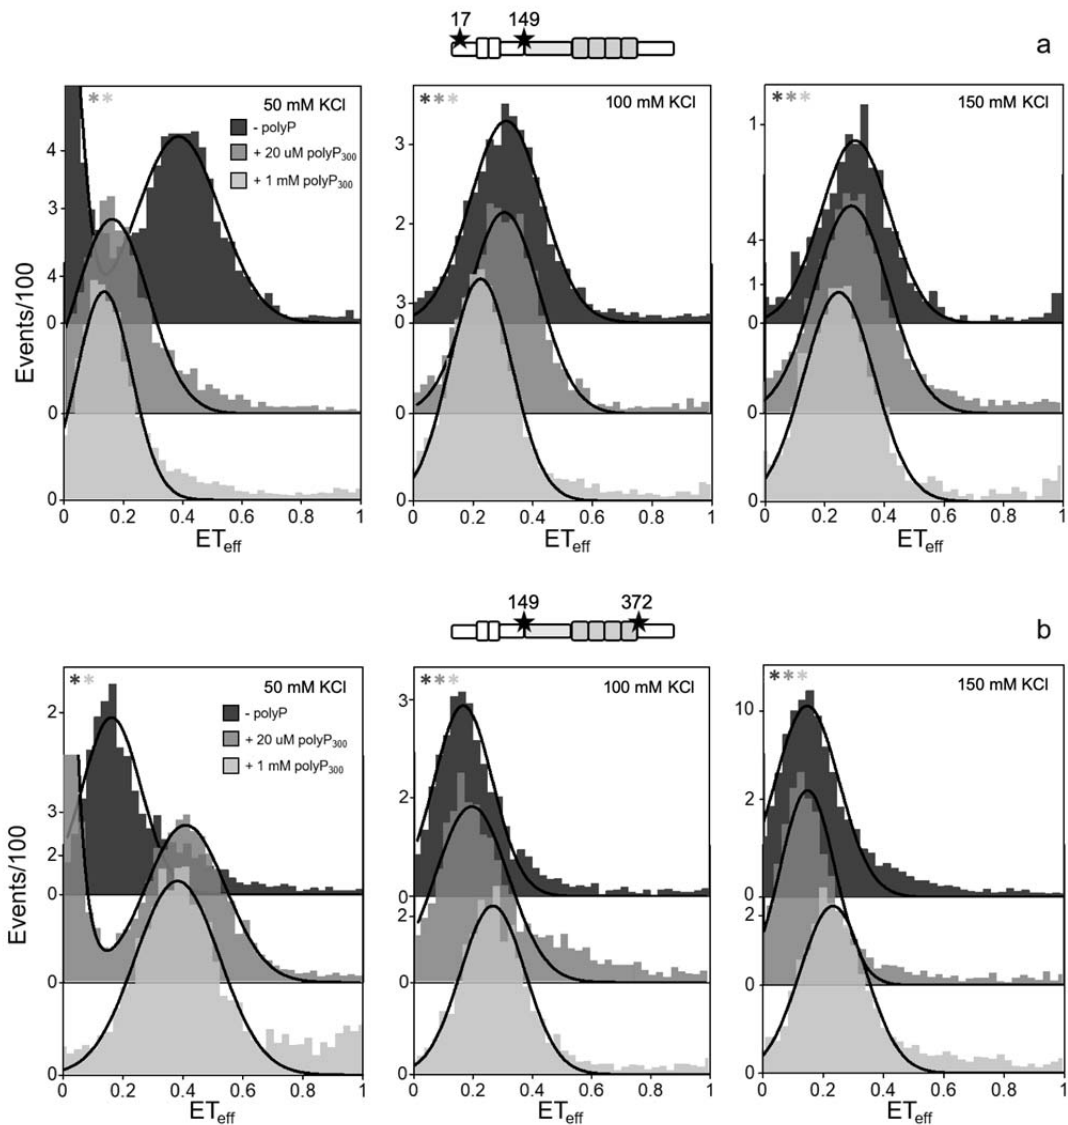

**Figure S4.  $ET_{eff}$  histograms in the presence of polyP and increased KCl** SmFRET measurements were made for 2N4R tau<sub>C17-C149</sub> (a) and tau<sub>C149-C372</sub> (b) with 50mM (left column), 100 mM (middle column) and 150 mM (right column) KCl in the absence of polyP (top row) and with the addition of 20  $\mu$ M (middle row) and 1 M polyP<sub>300</sub> (bottom row). While 20  $\mu$ M polyP causes only small changes in the histograms at higher salt concentrations, the polyP-bound peak is populated 1 M polyP<sub>300</sub> for both 100 mM and 150 mM KCl. An asterisk in the left hand corner of a panel indicates the measurement was made using PIE-FRET.

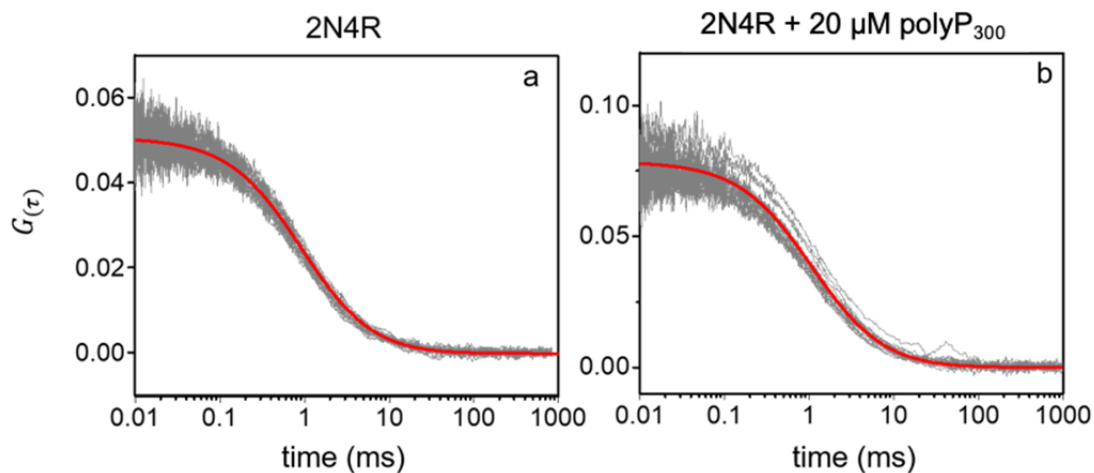

**Figure S5. Representative autocorrelation curves measured by FCS.** Shown are 25 individual autocorrelation curves of 10 seconds each (gray) along with the fit to the averaged curve (red) for 20 nM 2N4R tau in the absence (a) or presence (b) of 20  $\mu$ M polyP<sub>300</sub>.

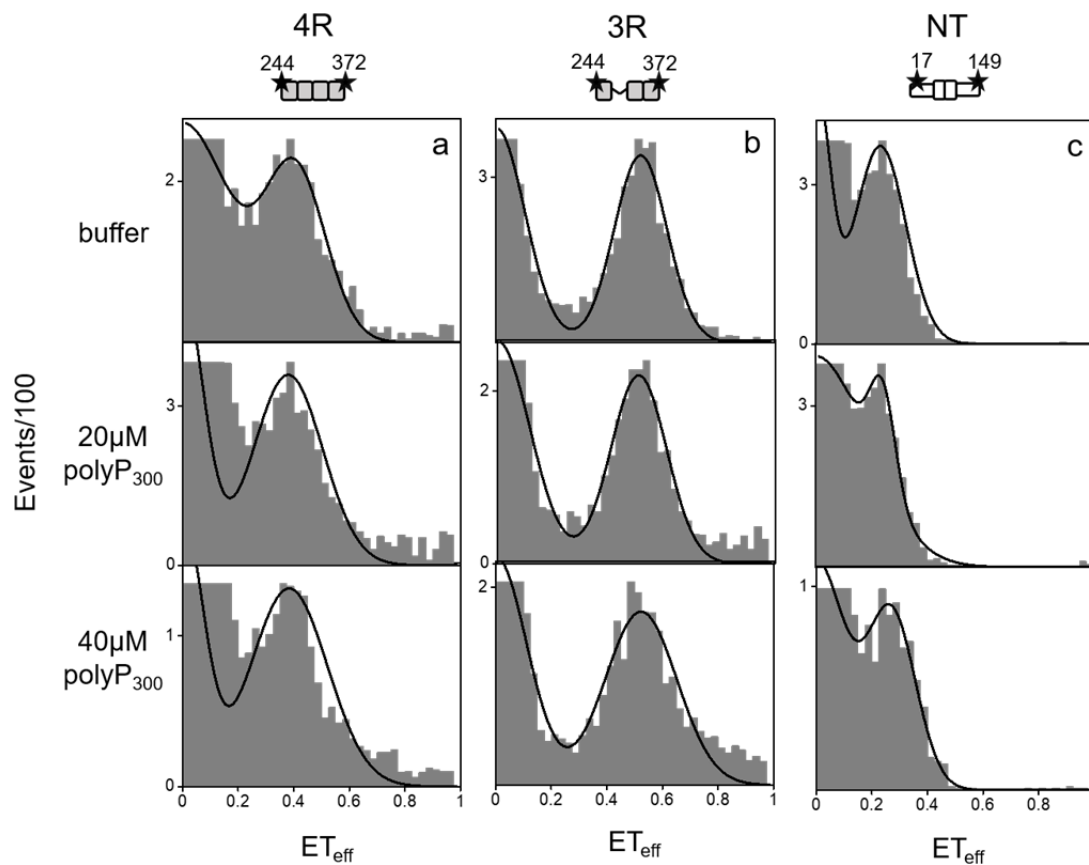

**Figure S6. PolyP does not cause conformational changes in the MTBR and N-terminal fragments.** Histograms measured by smFRET of 4R<sub>C244-C372</sub> (a), 3R<sub>C244-C372</sub> (b) and NT<sub>C17-C149</sub> (c) in the absence (upper row) and presence of 20 µM (center row) or 40 µM (lower row) polyP<sub>300</sub>. The higher polyP concentration was tested to determine whether weak binding occurs in either of these regions. No changes to the histograms are observed for these fragments even at the higher polyP concentration.



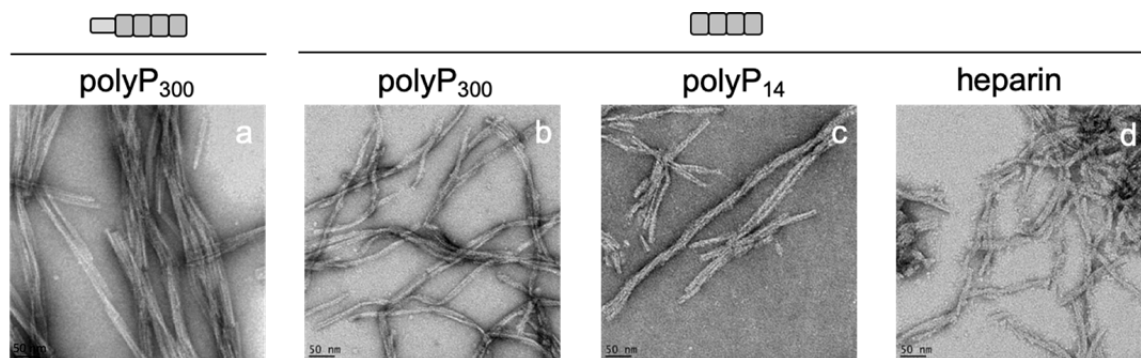

**Figure S7. TEM images of tau-polyP fibers.** Images of P2-4R with polyP<sub>300</sub> (a) and 4R with polyP<sub>300</sub> (b), polyP<sub>14</sub> (c) and heparin (d).

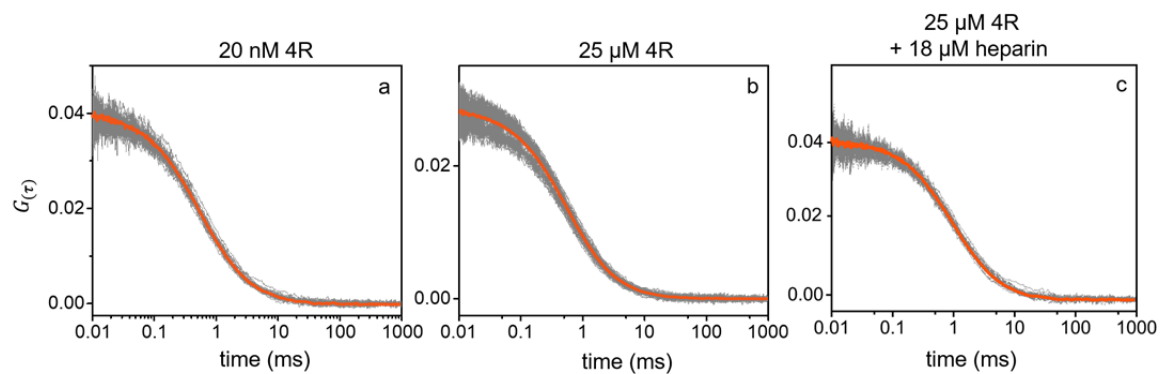

**Figure S8. PolyP is required for crosslinking of tau.** Autocorrelation curves of 20 nM labeled 4R in the absence (a) or presence (b) of 25  $\mu$ M unlabeled 4R or (c) 25  $\mu$ M unlabeled 4R and 18  $\mu$ M heparin. Fits of the averaged curves yield comparable diffusion times, despite the 1000x difference in tau concentration.

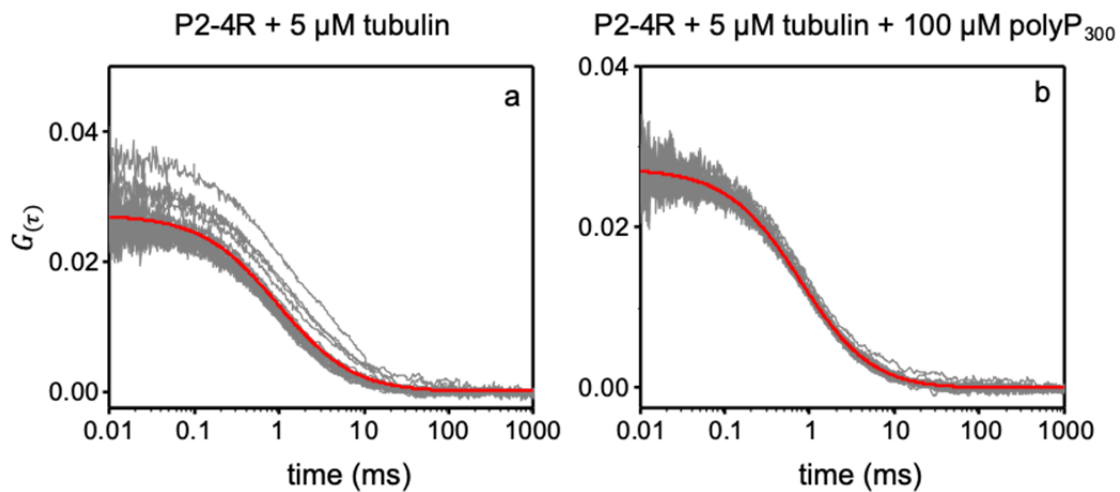

**Figure S9. Autocorrelation curves of P2-4R with tubulin and polyP<sub>300</sub>.**

Autocorrelation curves of P2-4R and 5  $\mu$ M tubulin in the absence (a) or presence (b) of 100  $\mu$ M polyP<sub>300</sub>.

| labeling positions | construct | ET <sub>eff</sub><br>(buffer) | ET <sub>eff</sub><br>(+ polyP <sub>300</sub> ) | ΔET <sub>eff</sub> |
|--------------------|-----------|-------------------------------|------------------------------------------------|--------------------|
| C17-C433           | 2N4R      | 0.15 ± 0.004                  | 0.09 ± 0.004                                   | -0.06 ± 0.006      |
|                    | 2N3R      | 0.18 ± 0.002                  | 0.11 ± 0.006                                   | -0.07 ± 0.006      |
| C17-C149           | 2N4R      | 0.40 ± 0.01                   | 0.18 ± 0.003                                   | -0.22 ± 0.010      |
|                    | 2N3R      | 0.40 ± 0.004                  | 0.21 ± 0.005                                   | -0.19 ± 0.006      |
| C149-C372          | 2N4R      | 0.17 ± 0.005                  | 0.40 ± 0.002                                   | 0.23 ± 0.005       |
|                    | 2N3R      | 0.19 ± 0.002                  | 0.44 ± 0.009                                   | 0.25 ± 0.009       |
| C372-C433          | 2N4R      | 0.69 ± 0.003                  | 0.50 ± 0.006                                   | -0.19 ± 0.007      |
|                    | 2N3R      | 0.66 ± 0.002                  | 0.46 ± 0.006                                   | -0.20 ± 0.006      |

**Table S1. Mean ET<sub>eff</sub> values for 2N3R and 2N4R tau in the absence and presence of 20 μM polyP<sub>300</sub>.** Mean ET<sub>eff</sub> and s.e.m. calculated for a minimum of three measurements with and without the addition of polyP. ΔET<sub>eff</sub> is the difference between tau+polyP<sub>300</sub> and tau. Error of ΔET<sub>eff</sub> is calculated by propagation of error as described in the *Materials and Methods*. Representative histograms are shown in Fig. 2.



|       | diffusion time ( $\mu\text{s}$ ) |                      |                     |
|-------|----------------------------------|----------------------|---------------------|
|       | buffer                           | polyP <sub>300</sub> | polyP <sub>14</sub> |
| 2N4R  | 925 $\pm$ 1                      | 1055 $\pm$ 5.6       | 940 $\pm$ 3.3       |
| P2-4R | 628 $\pm$ 8.5                    | 763 $\pm$ 3.3        | 672 $\pm$ 5         |
| 4R    | 534 $\pm$ 1.0                    | 617 $\pm$ 1.0        | 566 $\pm$ 1.2       |
| 2N3R  | 909 $\pm$ 12.0                   | 1056 $\pm$ 10.2      | 941 $\pm$ 1.3       |
| P2-3R | 430 $\pm$ 10.0                   | 504 $\pm$ 12.7       | 450 $\pm$ 7.0       |
| 3R    | 377 $\pm$ 2.5                    | 417 $\pm$ 1.4        | 390 $\pm$ 5.3       |
| P1P2  | 482 $\pm$ 4.3                    | 581 $\pm$ 2.2        | 502 $\pm$ 11.3      |
| NT    | 585 $\pm$ 0.7                    | 592 $\pm$ 8          | 585 $\pm$ 3.0       |
| aSyn* | 550                              | 550                  |                     |

**Table S2. Mean diffusion times of tau constructs in the absence and presence of polyP<sub>300</sub> or polyP<sub>14</sub>.** Mean diffusion time and s.e.m. calculated from three independent sets of measurements. The percent change in diffusion time with the addition of polyP is shown in Fig. 3. aSyn was only measured once as a control.

| labeling positions | construct | ET <sub>eff</sub><br>(buffer) | ET <sub>eff</sub><br>(+ polyP <sub>300</sub> ) | Δ ET <sub>eff</sub> |
|--------------------|-----------|-------------------------------|------------------------------------------------|---------------------|
| C244-C372          | 2N4R      | 0.29 ± 0.008                  | 0.51 ± 0.002                                   | 0.22 ± 0.008        |
|                    | P2-4R     | 0.31 ± 0.002                  | 0.43 ± 0.003                                   | 0.12 ± 0.004        |
|                    | 4R        | 0.39 ± 0.004                  | 0.39 ± 0.016                                   | 0 ± 0.016           |
| C244-C372          | 2N3R      | 0.40 ± 0.002                  | 0.59 ± 0.001                                   | 0.19 ± 0.002        |
|                    | P2-3R     | 0.44 ± 0.006                  | 0.50 ± 0.006                                   | 0.07 ± 0.008        |
|                    | 3R        | 0.51 ± 0.006                  | 0.50 ± 0.006                                   | -0.01 ± 0.008       |
| C149-C244          | 2N4R      | 0.35 ± 0.005                  | 0.50 ± 0.002                                   | 0.15 ± 0.005        |
|                    | 2N3R      | 0.36 ± 0.005                  | 0.54 ± 0.005                                   | 0.18 ± 0.007        |
|                    | PRR       | 0.39 ± 0.006                  | 0.47 ± 0.007                                   | 0.07 ± 0.009        |
| C17-C149           | 2N4R      | 0.40 ± 0.01                   | 0.18 ± 0.003                                   | -0.22 ± 0.010       |
|                    | 2N3R      | 0.40 ± 0.004                  | 0.21 ± 0.005                                   | -0.19 ± 0.006       |
|                    | NT        | 0.23 ± 0.014                  | 0.23 ± 0.015                                   | 0 ± 0.021           |

**Table S3. Mean ET<sub>eff</sub> for tau constructs in the absence and presence of polyP<sub>300</sub>.**

Mean ET<sub>eff</sub> and s.e.m calculated for a minimum of three measurements with and without the addition of polyP. ΔET<sub>eff</sub> is the difference between tau+polyP<sub>300</sub> and tau. Error of ΔET<sub>eff</sub> is calculated by propagation of error as described in the *Materials and Methods*. Representative histograms for the different conditions are show in Fig. 4 and Fig. S6.

| labeling positions | ET <sub>eff</sub> (buffer) | polyP                | ET <sub>eff</sub> (+polyP) | Δ ET <sub>eff</sub> |
|--------------------|----------------------------|----------------------|----------------------------|---------------------|
| C17-C149           | 0.40 ± 0.01                | polyP <sub>300</sub> | 0.18 ± 0.003               | -0.22 ± 0.010       |
|                    |                            | polyP <sub>130</sub> | 0.20 ± 0.004               | -0.20 ± 0.011       |
|                    |                            | polyP <sub>60</sub>  | 0.23 ± 0.009               | -0.17 ± 0.013       |
|                    |                            | polyP <sub>14</sub>  | 0.40 ± 0.013               | 0 ± 0.016           |
| C149-C372          | 0.17 ± 0.005               | polyP <sub>300</sub> | 0.40 ± 0.001               | 0.23 ± 0.005        |
|                    |                            | polyP <sub>130</sub> | 0.40 ± 0.004               | 0.23 ± 0.006        |
|                    |                            | polyP <sub>60</sub>  | 0.48 ± 0.01                | 0.35 ± 0.011        |
|                    |                            | polyP <sub>14</sub>  | 0.18 ± 0.029               | 0.01 ± 0.029        |

**Table S4. Mean ET<sub>eff</sub> of 2N4R tau in the absence and presence of different chain lengths of polyP.** Mean ET<sub>eff</sub> and s.e.m. calculated for a minimum of three measurements with and without the addition of polyP. ΔET<sub>eff</sub> is the difference between tau+polyP and tau. Error of ΔET<sub>eff</sub> is calculated by propagation of error as described in the *Materials and Methods*. Representative histograms of the different polyP chain lengths are shown in in Fig 5.

|           | $T_{1/2}$ (h)        |                      |                     |                     |             |
|-----------|----------------------|----------------------|---------------------|---------------------|-------------|
| construct | polyP <sub>300</sub> | polyP <sub>130</sub> | polyP <sub>60</sub> | polyP <sub>14</sub> | heparin     |
| 4R        | 0.4 ± 0.04           | 1.2 ± 0.07           | 3.4 ± 0.11          | 6.6 ± 0.51          | 15.5 ± 1.74 |
| 3R        | 4.3 ± 1.26           | 6.8 ± 1.07           | 30.3 ± 3.95         | 44.1 ± 3.2          | 67.2 ± 4.63 |

|                      | $T_{1/2}$ (h) |             |             |             |
|----------------------|---------------|-------------|-------------|-------------|
| construct            | P2-4R         | P2-3R       | 4R          | 3R          |
| polyP <sub>300</sub> | 0.3 ± 0.12    | 1.0 ± 0.32* | 0.4 ± 0.03* | 4.3 ± 0.80* |
| polyP <sub>14</sub>  | 8.0 ± 0.65    | 25.1 ± 2.33 | 7.2 ± 0.35  | 42.3 ± 2.32 |

**Table S5. Aggregation half-times ( $T_{1/2}$ ).** Mean  $T_{1/2}$  and s.e.m. from ensemble experiments using ThT fluorescence to follow aggregation kinetics. For the polyP<sub>300</sub> data, differences in the  $T_{1/2}$  of 3R as compared to 4R, P2-3R and P2-4R are statistically significant (denoted by \*) with p-values of 0.0007, 0.004 and 0.003 respectively. Table contains  $T_{1/2}$  times shown in Fig 6.

| labeling positions | ET <sub>eff</sub> (buffer) | heparin (μM) | ET <sub>eff</sub> (+ heparin) | ΔET <sub>eff</sub> |
|--------------------|----------------------------|--------------|-------------------------------|--------------------|
| C17-C149           | 0.40 ± 0.01                | 0.13         | 0.24 ± 0.003                  | -0.16 ± 0.010      |
|                    |                            | 1.75         | 0.24 ± 0.003                  | -0.16 ± 0.010      |
| C149-C372          | 0.17 ± 0.005               | 0.13         | 0.36 ± 0.001                  | 0.19 ± 0.005       |
|                    |                            | 1.75         | 0.35 ± 0.006                  | 0.18 ± 0.008       |

**Table S6. Mean ET<sub>eff</sub> of 2N4R tau in the absence and presence of heparin.** Mean ET<sub>eff</sub> and s.e.m. calculated for a minimum of three measurements without and with the addition of heparin. ΔET<sub>eff</sub> is the difference between tau+heparin and tau. Error of ΔET<sub>eff</sub> is calculated by propagation of error as described in the *Materials and Methods*.

Representative histograms are shown in Fig 7.

### Supporting References

1. Elbaum-Garfinkle, S., and E. Rhoades. 2012. Identification of an aggregation-prone structure of tau. *J Am Chem Soc.* 134:16607-16613.
